# Supplementary material
Source: publisher site journal article supplement (https://www.dovepress.com/article/570971)
Supplement: Supplementary file 1 [file 570971%20Revised%20Supplementary%20Material.docx]

**Table S1 Sociodemographic Information and Sleep-Related Parenting Practices Influence Others Sleep Problem**

|  |  | Sleep Duration on Weekdays(h),mean ± SD | Sleep Duration on Weekends(h),mean ± SD | Average Sleep Duration(h),mean ± SD | Sleep Quality(h),mean ± SD |
| --- | --- | --- | --- | --- | --- |
| All |  | 10.23±2.81 | 10.65±2.53 | 10.44±2.21 | 5.54±1.40 |
| Positive Rate of Sleep Problems[5] |  | 434(34.9) | 308(24.8) | 439(35.5) | 328(42.2) |
| Gender |  |  |  |  |  |
|  | Boy | 10.22±2.75 | 10.55±1.51 | 10.55±1.51 | 5.47±1.41 |
|  | Girl | 10.24±2.86 | 10.74±3.24 | 10.74±3.24 | 5.6±1.39 |
|  | t(P) | -0.127(0.899) | -1.305(0.192) | -0.828(0.408) | -1.624(0.105) |
| Age |  |  |  |  |  |
|  | 3-year | 10.39±3.31 | 10.88±3.35 | 10.64±2.67 | 5.54±1.39 |
|  | 4-year | 10.1±2.29 | 10.45±1.51 | 10.28±1.72 | 5.54±1.41 |
|  | t(P) | 1.843(0.066) | 2.819(0.005) | 2.882(0.004) | -0.088(0.93) |
| Caregivers' highest Education |  |  |  |  |  |
|  | Low Education | 10.97±6.75 | 11.02±2.26 | 10.99±4.17 | 5.39±1.8 |
|  | High Education | 10.16±1.99 | 10.61±2.57 | 10.39±1.89 | 5.55±1.36 |
|  | t(P) | 1.28(0.203) | 1.631(0.103) | 1.545(0.125) | -0.909(0.365) |
| Caregivers' age |  |  |  |  |  |
|  | <30 | 10.15±1.53 | 10.77±1.74 | 10.46±1.5 | 5.54±1.45 |
|  | 30～39 | 10.22±2.95 | 10.59±2.84 | 10.41±2.35 | 5.53±1.39 |
|  | >=40 | 10.46±3.67 | 10.76±1.5 | 10.61±2.42 | 5.58±1.4 |
|  | F(P) | 0.535(0.586) | 0.630(0.533) | 0.493(0.611) | 0.088(0.916) |
| Area in China |  |  |  |  |  |
|  | East | 10.2±2.65 | 10.75±3.57 | 10.48±2.51 | 5.45±1.4 |
|  | Middle | 10.44±3.98 | 10.52±1.62 | 10.48±2.56 | 5.6±1.36 |
|  | West | 10.03±1.3 | 10.62±1.43 | 10.33±1.24 | 5.45±1.45 |
|  | Northeast | 10.24±1.4 | 10.7±1.79 | 10.47±1.46 | 5.88±1.33 |
|  | F(P) | 1.128(0.337) | 0.615(0.605) | 0.329(0.805) | 3.962(0.008) |
| Location |  |  |  |  |  |
|  | Urban | 10.06±1.28 | 10.61±3.03 | 10.34±1.82 | 5.5±1.37 |
|  | Rural | 10.43±3.87 | 10.69±1.8 | 10.56±2.58 | 5.59±1.44 |
|  | t(P) | -2.182(0.029) | -0.518(0.605) | -1.76(0.079) | -1.134(0.257) |
| Parental smartphone use during bedtime routine |  |  |  |  |  |
|  | Never | 10.27±2.29 | 10.67±1.56 | 10.47±1.73 | 5.67±1.37 |
|  | Sometimes | 10.2±3.3 | 10.63±3.31 | 10.41±2.66 | 5.39±1.42 |
|  | t(P) | 0.408(0.683) | 0.257(0.797) | 0.406(0.685) | 3.494(<0.000) |
| Electronic device in the bedroom |  |  |  |  |  |
|  | Yes | 10.14±1.39 | 10.78±3.49 | 10.46±2.07 | 5.5±1.39 |
|  | Not | 10.3±3.45 | 10.56±1.58 | 10.43±2.3 | 5.56±1.41 |
|  | t(P) | -0.945(0.345) | 1.443(0.149) | 0.226(0.821) | -0.768(0.443) |
| Child electronic device use within two hours before bedtime |  |  |  |  |  |
|  | Use | 10.24±3.27 | 10.66±3.28 | 10.45±2.62 | 5.52±1.37 |
|  | Non-Use | 10.27±2.35 | 10.68±1.59 | 10.47±1.78 | 5.57±1.43 |
|  | t(P) | -0.196(0.845) | -0.138(0.891) | -0.204(0.839) | -0.637(0.525) |
| Bedtime routine frequency[2] |  |  |  |  |  |
|  | Never | 10.07±2.86 | 10.62±1.68 | 10.34±2.07 | 5.41±1.56 |
|  | Sometimes | 10.25±2.82 | 10.65±2.59 | 10.45±2.23 | 5.55±1.39 |
|  | t(P) | -0.498(0.618) | -0.119(0.905) | -0.385(0.7) | -0.81(0.418) |
| Nap[3] |  |  |  |  |  |
|  | Yes | 10.24±2.31 | 10.7±2.6 | 10.47±2.04 | 5.55±1.38 |
|  | Not | 10.21±5.82 | 10.18±1.63 | 10.19±3.51 | 5.44±1.58 |
|  | t(P) | 0.092(0.927) | 2.078(0.038) | 1.248(0.212) | 0.805(0.421) |
| Wake-up time variability |  |  |  |  |  |
|  | Change Within 30 Minutes | 10.29±2.93 | 10.68±2.63 | 10.49±2.29 | 5.57±1.38 |
|  | Changes Over 30 Minutes | 9.82±1.47 | 10.38±1.52 | 10.1±1.37 | 5.27±1.49 |
|  | t(P) | 1.866(0.062) | 1.359(0.174) | 1.964(0.05) | 2.396(0.017) |
| Bedtime variability |  |  |  |  |  |
|  | Change within 30 Minutes | 10.37±3.07 | 10.72±2.75 | 10.54±2.39 | 5.61±1.36 |
|  | Changes over 30 Minutes | 9.75±1.39 | 10.39±1.41 | 10.07±1.26 | 5.26±1.5 |
|  | t(P) | 3.175(0.002) | 1.833(0.067) | 3.068(0.002) | 3.707(<0.000) |
| Co-Room/Bed sleep arrangement |  |  |  |  |  |
|  | Alone in One House | 10.15±1.41 | 10.51±1.52 | 10.33±1.4 | 5.28±1.64 |
|  | Alone in One Bed | 10.2±1.61 | 10.57±1.83 | 10.38±1.62 | 5.45±1.42 |
|  | Shared Bed | 10.24±3.01 | 10.67±2.67 | 10.46±2.32 | 5.56±1.39 |
|  | F(P) | 0.041(0.959) | 0.176(0.839) | 0.136(0.873) | 1.162(0.313) |

**Table S2 Binomial Logistic Regression Analysis of the Influence of Parenting Practices on Others Sleep Problem***

| Variable | Sleep Duration on Weekdays | | | Sleep Duration on Weekends | | | Average Sleep Duration | | | Sleep Quality | | |
| --- | --- | --- | --- | --- | --- | --- | --- | --- | --- | --- | --- | --- |
| β | 95%CI | P | β | 95%CI | P | β | 95%CI | P | β | 95%CI | P |
| Electronic device in the bedroom | -0.209 | -0.399～-0.018 | 0.163 | 0.347 | -0.172～0.866 | 0.517 | -0.411 | -0.945～0.124 | 0.390 | 0.023 | -0.194～0.24 | 0.939 |
| Timing of child electronic device use | -0.032 | -0.159～0.096 | 0.923 | -0.223 | -0.565～0.12 | 0.525 | -0.203 | -0.558～0.152 | 0.650 | -0.004 | -0.149～0.141 | 0.972 |
| Nap | -0.353 | -0.683～-0.022 | 0.155 | 1.059 | 0.165～1.952 | 0.106 | -0.258 | -1.184～0.669 | 0.923 | -0.18 | -0.552～0.192 | 0.717 |
| Bedtime variability | -0.325 | -0.585～-0.064 | 0.086 | -0.748 | -1.446～-0.049 | 0.156 | -0.338 | -1.063～0.386 | 0.735 | -0.317 | -0.609～-0.024 | 0.159 |
| Wake-up time variability | 0.059 | -0.276～0.394 | 0.928 | -0.207 | -1.117～0.704 | 0.903 | 0.066 | -0.878～1.013 | 0.974 | -0.114 | -0.487～0.259 | 0.894 |
| Parental smartphone use during bedtime routine | -0.314 | -0.505～-0.123 | 0.020 | 0.138 | -0.378～0.655 | 0.922 | 0.036 | -0.499～0.572 | 0.969 | -0.34 | -0.557～-0.124 | 0.029 |
| Bedtime routine | 0.022 | -0.064～0.108 | 0.933 | 0.25 | 0.018～0.482 | 0.158 | 0.128 | -0.113～0.37 | 0.632 | 0.057 | -0.04～0.155 | 0.633 |
| Co-Room sleep arrangement | 0.364 | -0.414～1.143 | 0.724 | 0.739 | -1.363～2.842 | 0.856 | 0.424 | -1.747～2.594 | 0.903 | 0.108 | -0.786～1.001 | 0.942 |
| Co-Bed sleep arrangement | 0.568 | -0.17～1.306 | 0.383 | 0.699 | -1.294～2.694 | 0.845 | 0.429 | -1.629～2.486 | 0.908 | 0.293 | -0.554～1.141 | 0.841 |

**Abbreviation:** OR, odds ratio; CI, confidence interval;CSHQ, Children's Sleep Habits Questionnaire

*****Adjusted for child age, gender, residence, regional in China, caregivers’ highest education and caregivers' age

**Table S3 Binomial Logistic Regression Analysis of the Influence of Parenting Practices on Sleep Problem***

| Variable | CSHQ | | | BR | | | SOD | | | SD | | |
| --- | --- | --- | --- | --- | --- | --- | --- | --- | --- | --- | --- | --- |
|  | β | 95%CI | P | β | 95%CI | P | β | 95%CI | P | β | 95%CI | P |
| Electronic Device in the Bedroom | -0.345 | -1.31～0.621 | 0.858 | -0.034 | -0.361～0.294 | 0.936 | -0.106 | -0.223～0.01 | 0.248 | -0.219 | -0.444～0.006 | 0.208 |
| Timing of Child Electronic Device Use | -0.256 | -0.899～0.387 | 0.821 | -0.143 | -0.361～0.075 | 0.527 | 0.019 | -0.058～0.096 | 0.907 | -0.026 | -0.176～0.124 | 0.910 |
| Nap | 1.606 | -0.056～3.269 | 0.206 | -0.035 | -0.599～0.53 | 0.970 | 0.111 | -0.089～0.311 | 0.614 | 0.615 | 0.227～1.003 | 0.023 |
| Bedtime Variability | 3.428 | 2.127～4.732 | <0.000 | 0.434 | -0.007～0.876 | 0.204 | 0.334 | 0.177～0.491 | <0.000 | 0.942 | 0.638～1.245 | 0.001 |
| Wake-up Time Variability | -0.066 | -1.73～1.593 | 0.988 | 0.18 | -0.383～0.743 | 0.875 | -0.051 | -0.251～0.148 | 0.930 | 0.065 | -0.322～0.452 | 0.914 |
| Parental Smartphone Use During Bedtime Routine | 0.963 | -0.006～1.933 | 0.203 | 0.238 | -0.091～0.567 | 0.445 | 0.153 | 0.036～0.269 | 0.073 | 0.04 | -0.187～0.266 | 0.918 |
| Bedtime Routine | -0.125 | -0.558～0.309 | 0.917 | -0.017 | -0.164～0.13 | 0.929 | -0.011 | -0.063～0.042 | 0.896 | -0.091 | -0.192～0.01 | 0.250 |
| Co-Room Sleep Arrangement | -5.929 | -9.919～-1.945 | 0.036 | 1.469 | 0.117～2.822 | 0.161 | -0.256 | -0.734～0.222 | 0.633 | -0.642 | -1.572～0.288 | 0.490 |
| Co-Bed Sleep Arrangement | -5.914 | -9.697～-2.134 | 0.026 | 1.549 | 0.266～2.832 | 0.100 | -0.202 | -0.656～0.251 | 0.756 | -0.499 | -1.381～0.383 | 0.640 |

**Table S3(continued) Binomial Logistic Regression Analysis of the Influence of Parenting Practices on Sleep Problem***

| Variable | SA | | | NW | | | PA | | | SDB | | | DS | | |
| --- | --- | --- | --- | --- | --- | --- | --- | --- | --- | --- | --- | --- | --- | --- | --- |
|  | β | 95%CI | P | β | 95%CI | P | β | 95%CI | P | β | 95%CI | P | β | 95%CI | P |
| Electronic Device in the Bedroom | 0 | -0.295～0.296 | 0.998 | 0.034 | -0.115～0.183 | 0.908 | 0.041 | -0.221～0.304 | 0.904 | 0.021 | -0.081～0.123 | 0.899 | -0.053 | -0.457～0.351 | 0.932 |
| Timing of Child Electronic Device Use | -0.07 | -0.267～0.126 | 0.866 | -0.005 | -0.104～0.094 | 0.982 | -0.005 | -0.180.169 | 0.979 | 0.026 | -0.042～0.094 | 0.849 | 0.011 | -0.257～0.278 | 0.980 |
| Nap | -0.083 | -0.591～0.424 | 0.901 | 0.141 | -0.116～0.398 | 0.623 | 0.413 | -0.039～0.865 | 0.244 | -0.015 | -0.191～0.161 | 0.959 | -0.021 | -0.715～0.673 | 0.986 |
| Bedtime Variability | 0.054 | -0.345～0.453 | 0.932 | -0.033 | -0.234～0.168 | 0.908 | 0.442 | 0.089～0.796 | 0.082 | 0.146 | 0.009～0.284 | 0.149 | 0.809 | 0.267～1.352 | 0.029 |
| Wake-up Time Variability | -0.115 | -0.623～0.394 | 0.895 | 0.105 | -0.152～0.361 | 0.813 | 0.012 | -0.439～0.462 | 0.968 | 0.065 | -0.11～0.241 | 0.850 | -0.392 | -1.082～0.299 | 0.648 |
| Parental Smartphone Use During Bedtime Routine | 0.239 | -0.058～0.535 | 0.360 | 0.033 | -0.117～0.183 | 0.897 | 0.148 | -0.115～0.412 | 0.617 | -0.034 | -0.137～0.069 | 0.862 | 0.175 | -0.228～0.579 | 0.766 |
| Bedtime Routine | 0.016 | -0.117～0.148 | 0.934 | -0.016 | -0.083～0.051 | 0.916 | 0.032 | -0.086～0.15 | 0.927 | 0.037 | -0.009～0.083 | 0.351 | 0.042 | -0.138～0.223 | 0.909 |
| Co-Room Sleep Arrangement | 0.685 | -0.534～1.905 | 0.629 | -1.343 | -1.959～-0.728 | 0.000 | -1.393 | -2.475～-0.311 | 0.078 | -0.603 | -1.025～-0.182 | 0.042 | -2.192 | -3.853～-0.532 | 0.069 |
| Co-Bed Sleep Arrangement | 0.287 | -0.868～1.442 | 0.914 | -1.54 | -2.124～-0.956 | 0.001 | -1.636 | -2.663～-0.609 | 0.021 | -0.689 | -1.089～-0.289 | 0.017 | -2.195 | -3.772～-0.617 | 0.047 |

**Abbreviation:** OR, odds ratio; CI, confidence interval; CSHQ, Children's Sleep Habits Questionnaire; **BR, bedtime resistance; SOD, sleep onset delay; SD, sleep duration; SA, sleep anxiety; NW, night wakings; PA, parasomnias; SDB, sleep disordered breathing; DS, daytime sleepiness**

*****Adjusted for child age, gender, residence, regional in China, caregivers’ highest education and caregivers' age

Agreed to participate (n = 1316)

1305 completed questionnaires

1295 valid questionnaire

Excluded 10 invalid questionnaire data

11 dropped out due to personal reasons, e.g., sick

**Figure S1:** Data flow chart


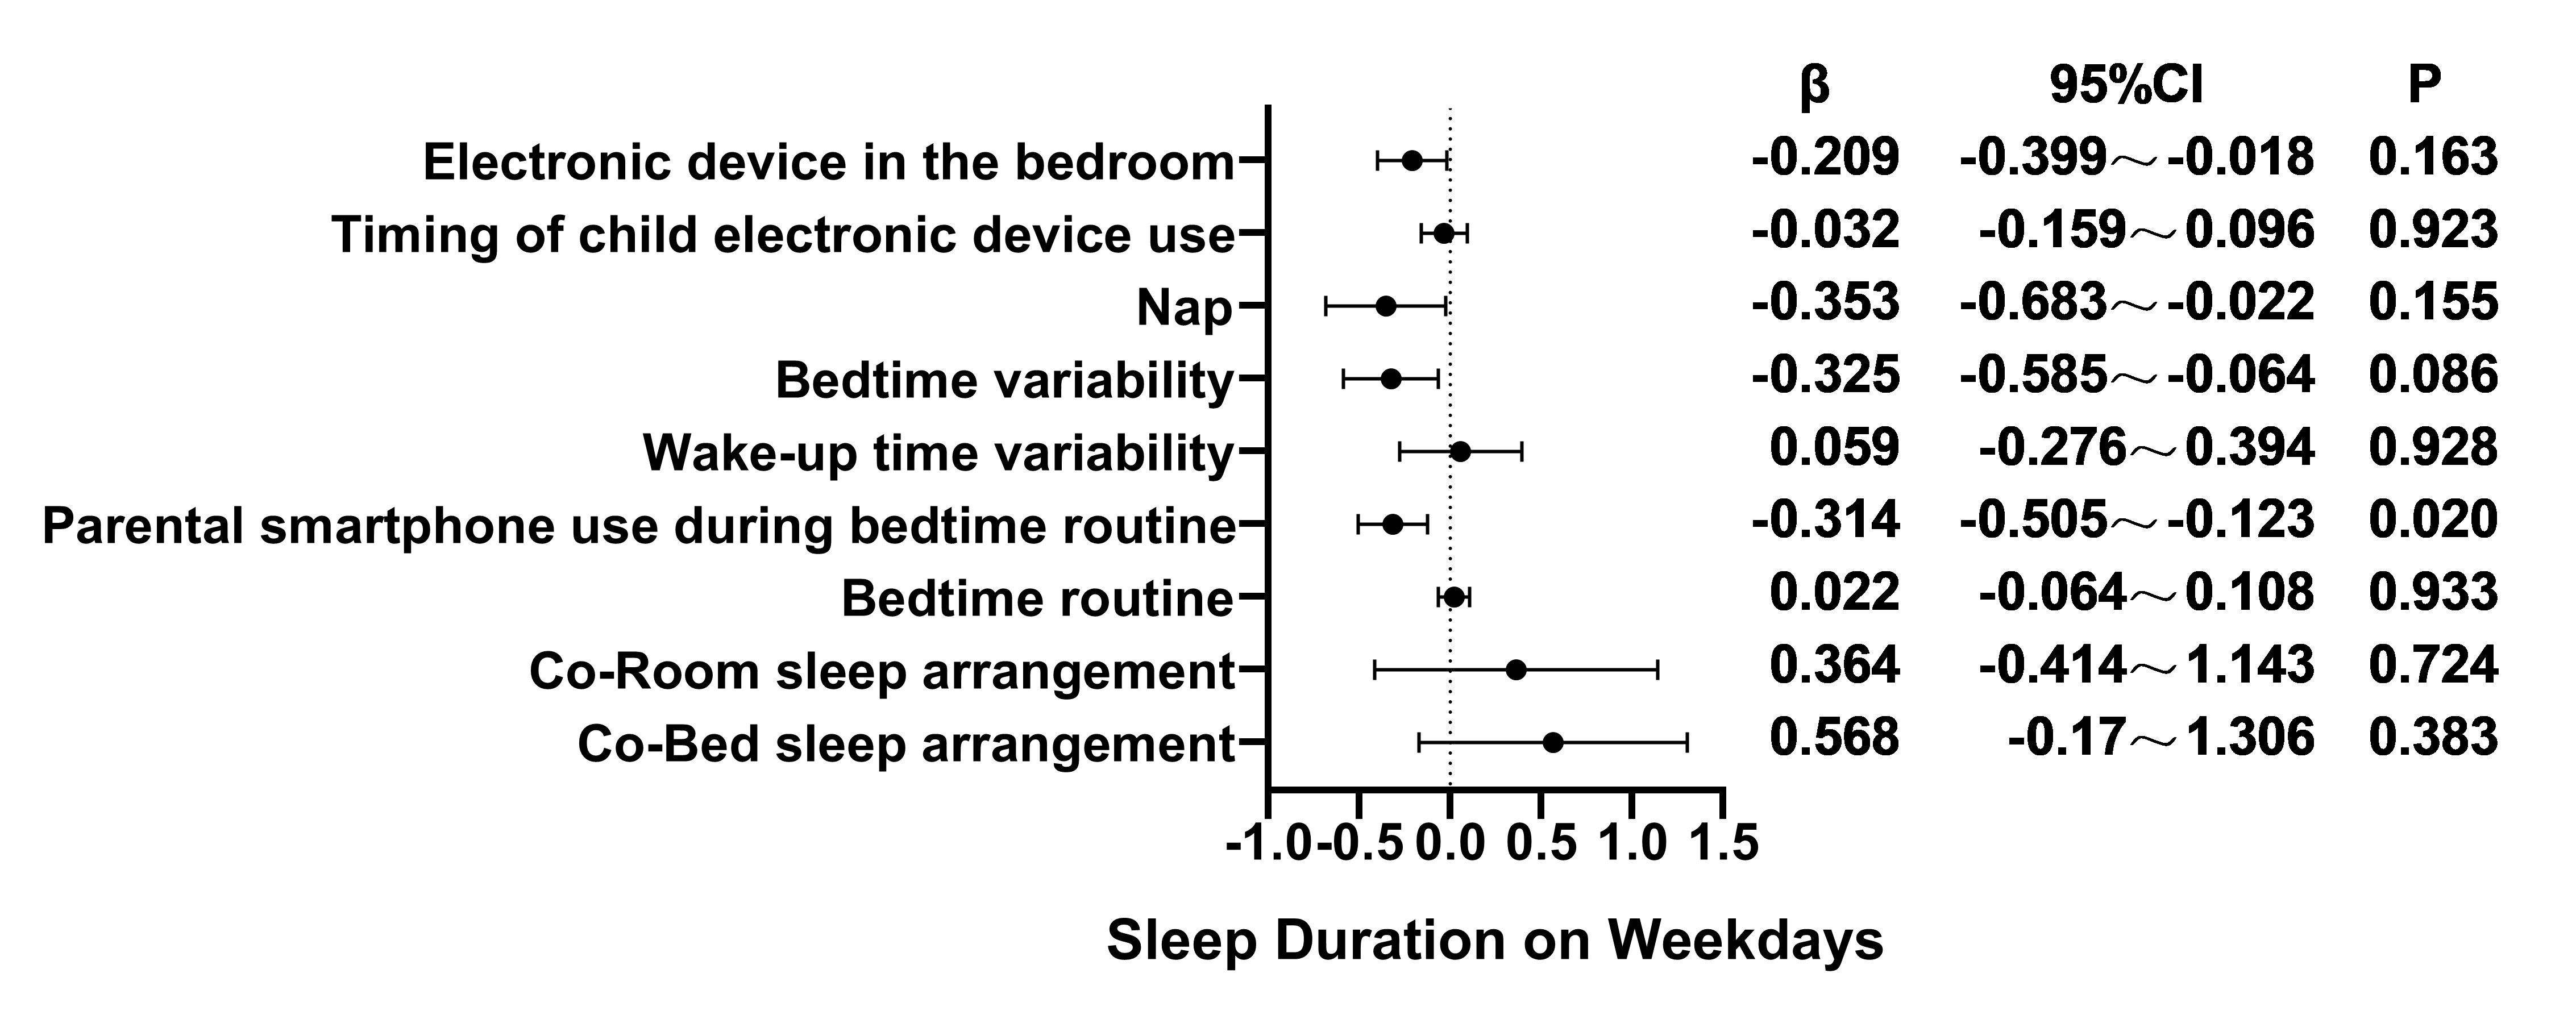


**Figure S2:** Relationship of **Parenting Practices with Sleep Duration on Weekdays. Abbreviation: CSHQ, Children's Sleep Habits Questionnaire; CI, confidence interval**


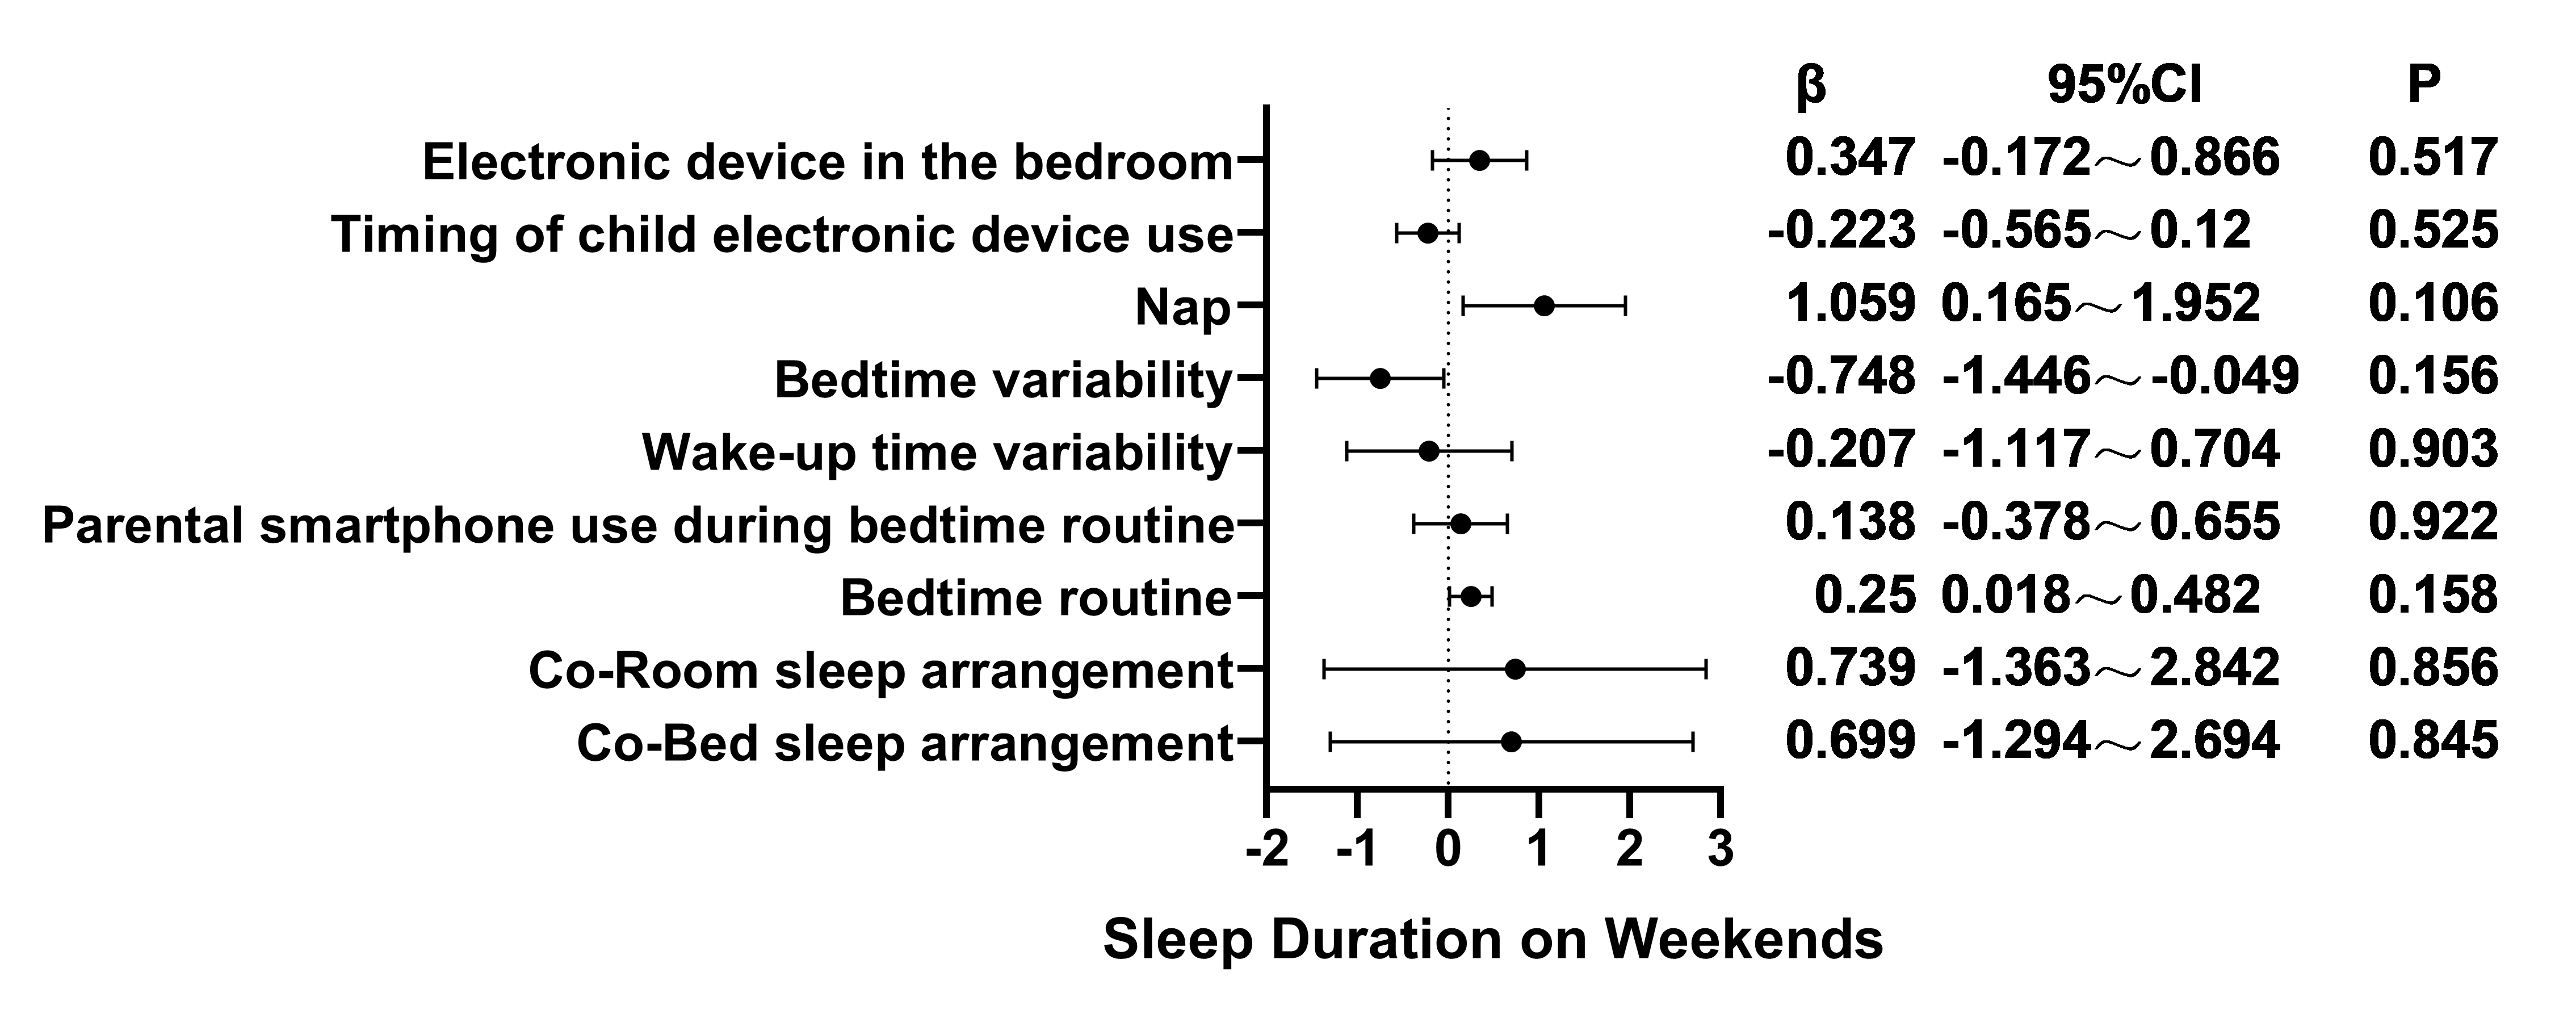


**Figure S3:** Relationship of **Parenting Practices with Sleep Duration on Weekends. Abbreviation: CSHQ, Children's Sleep Habits Questionnaire; CI, confidence interval**

**
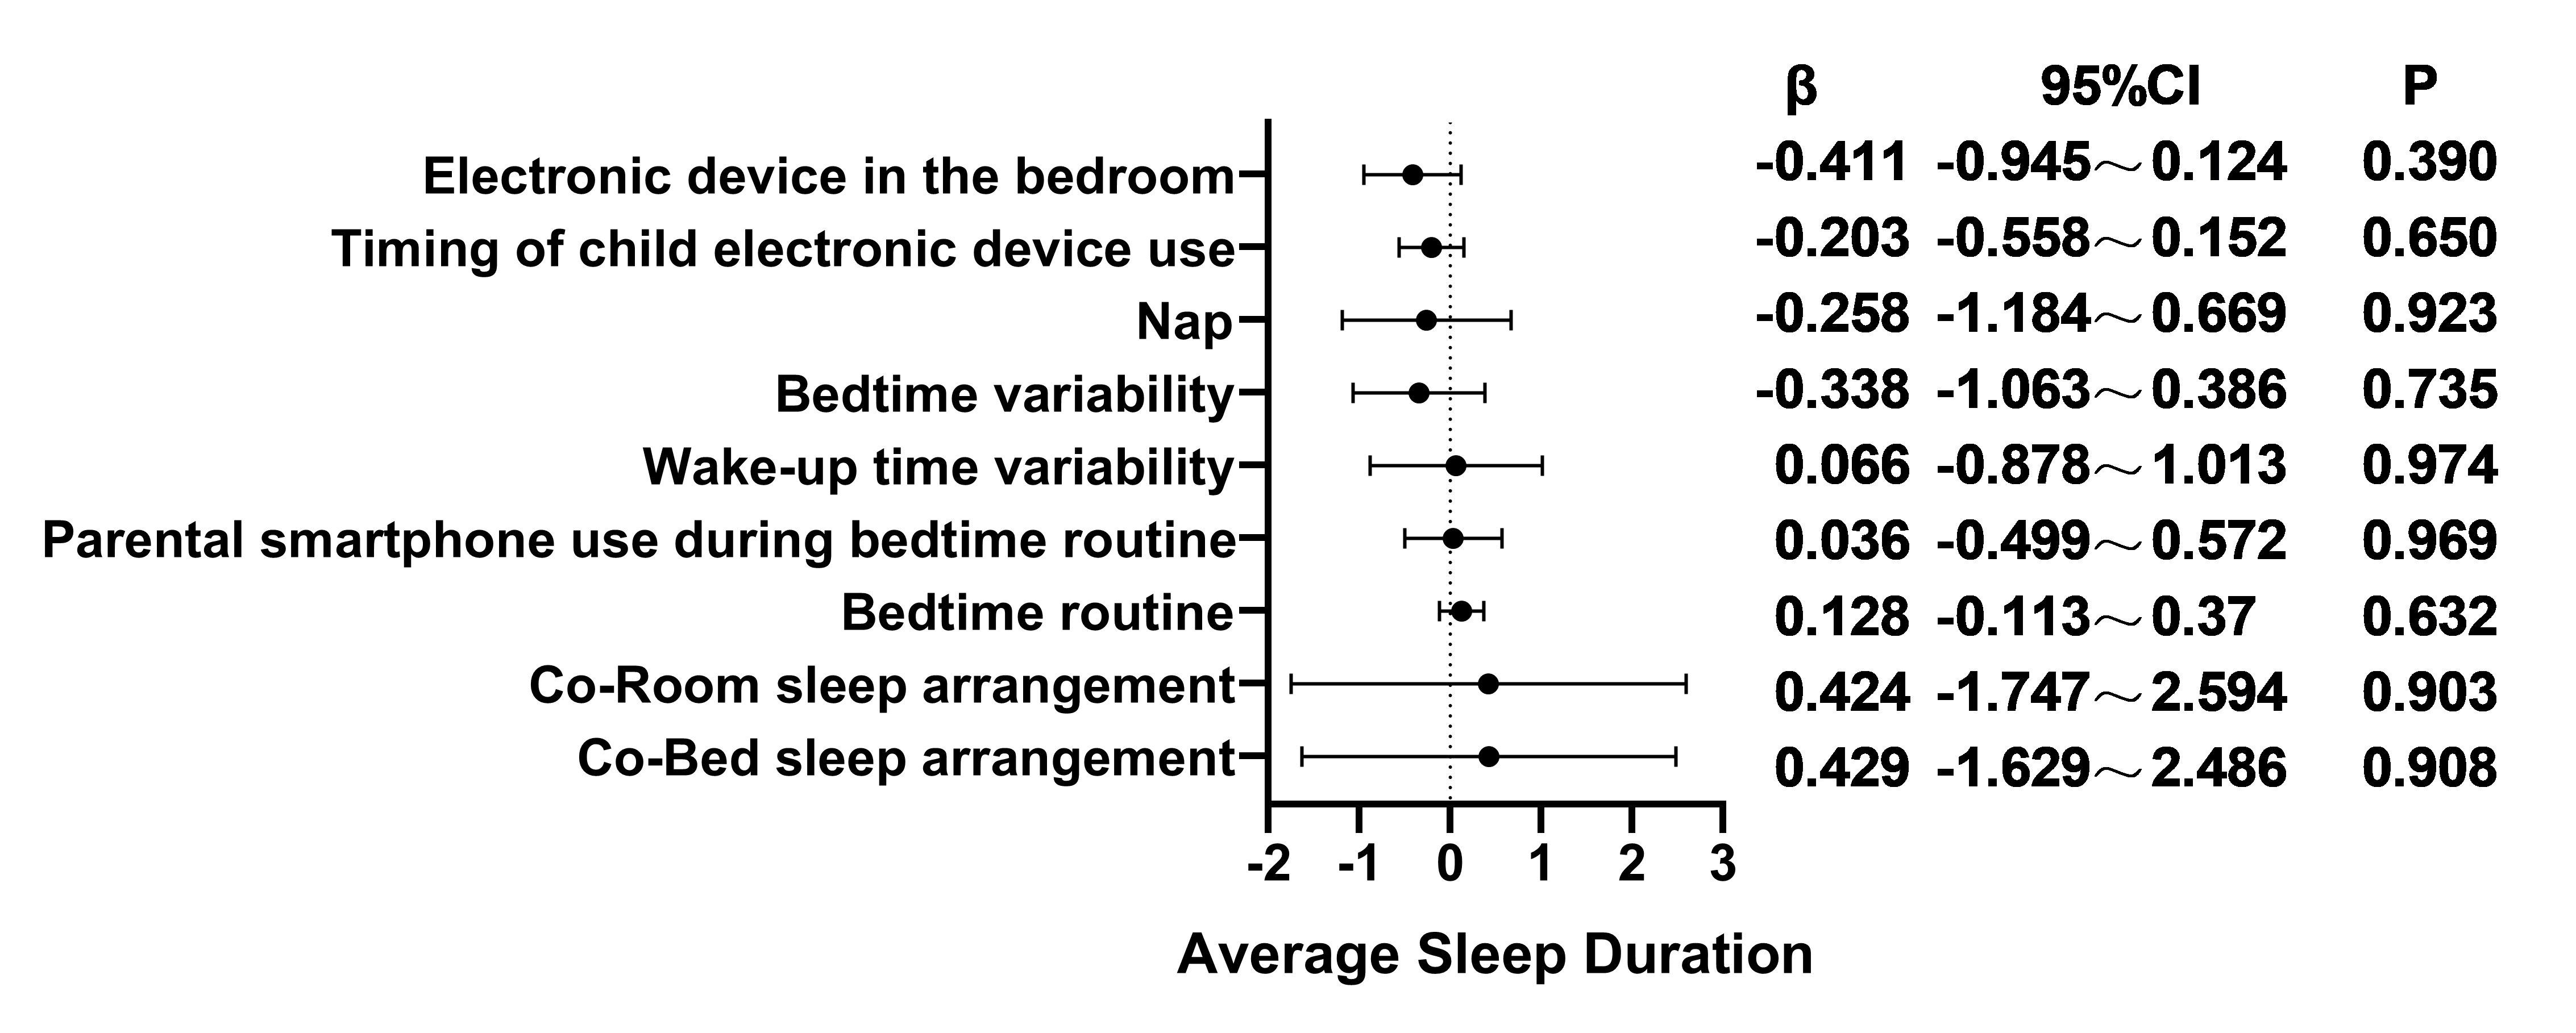
**

**Figure S4:** Relationship of **Parenting Practices with Average Sleep Duration. Abbreviation: CSHQ, Children's Sleep Habits Questionnaire; CI, confidence interval**


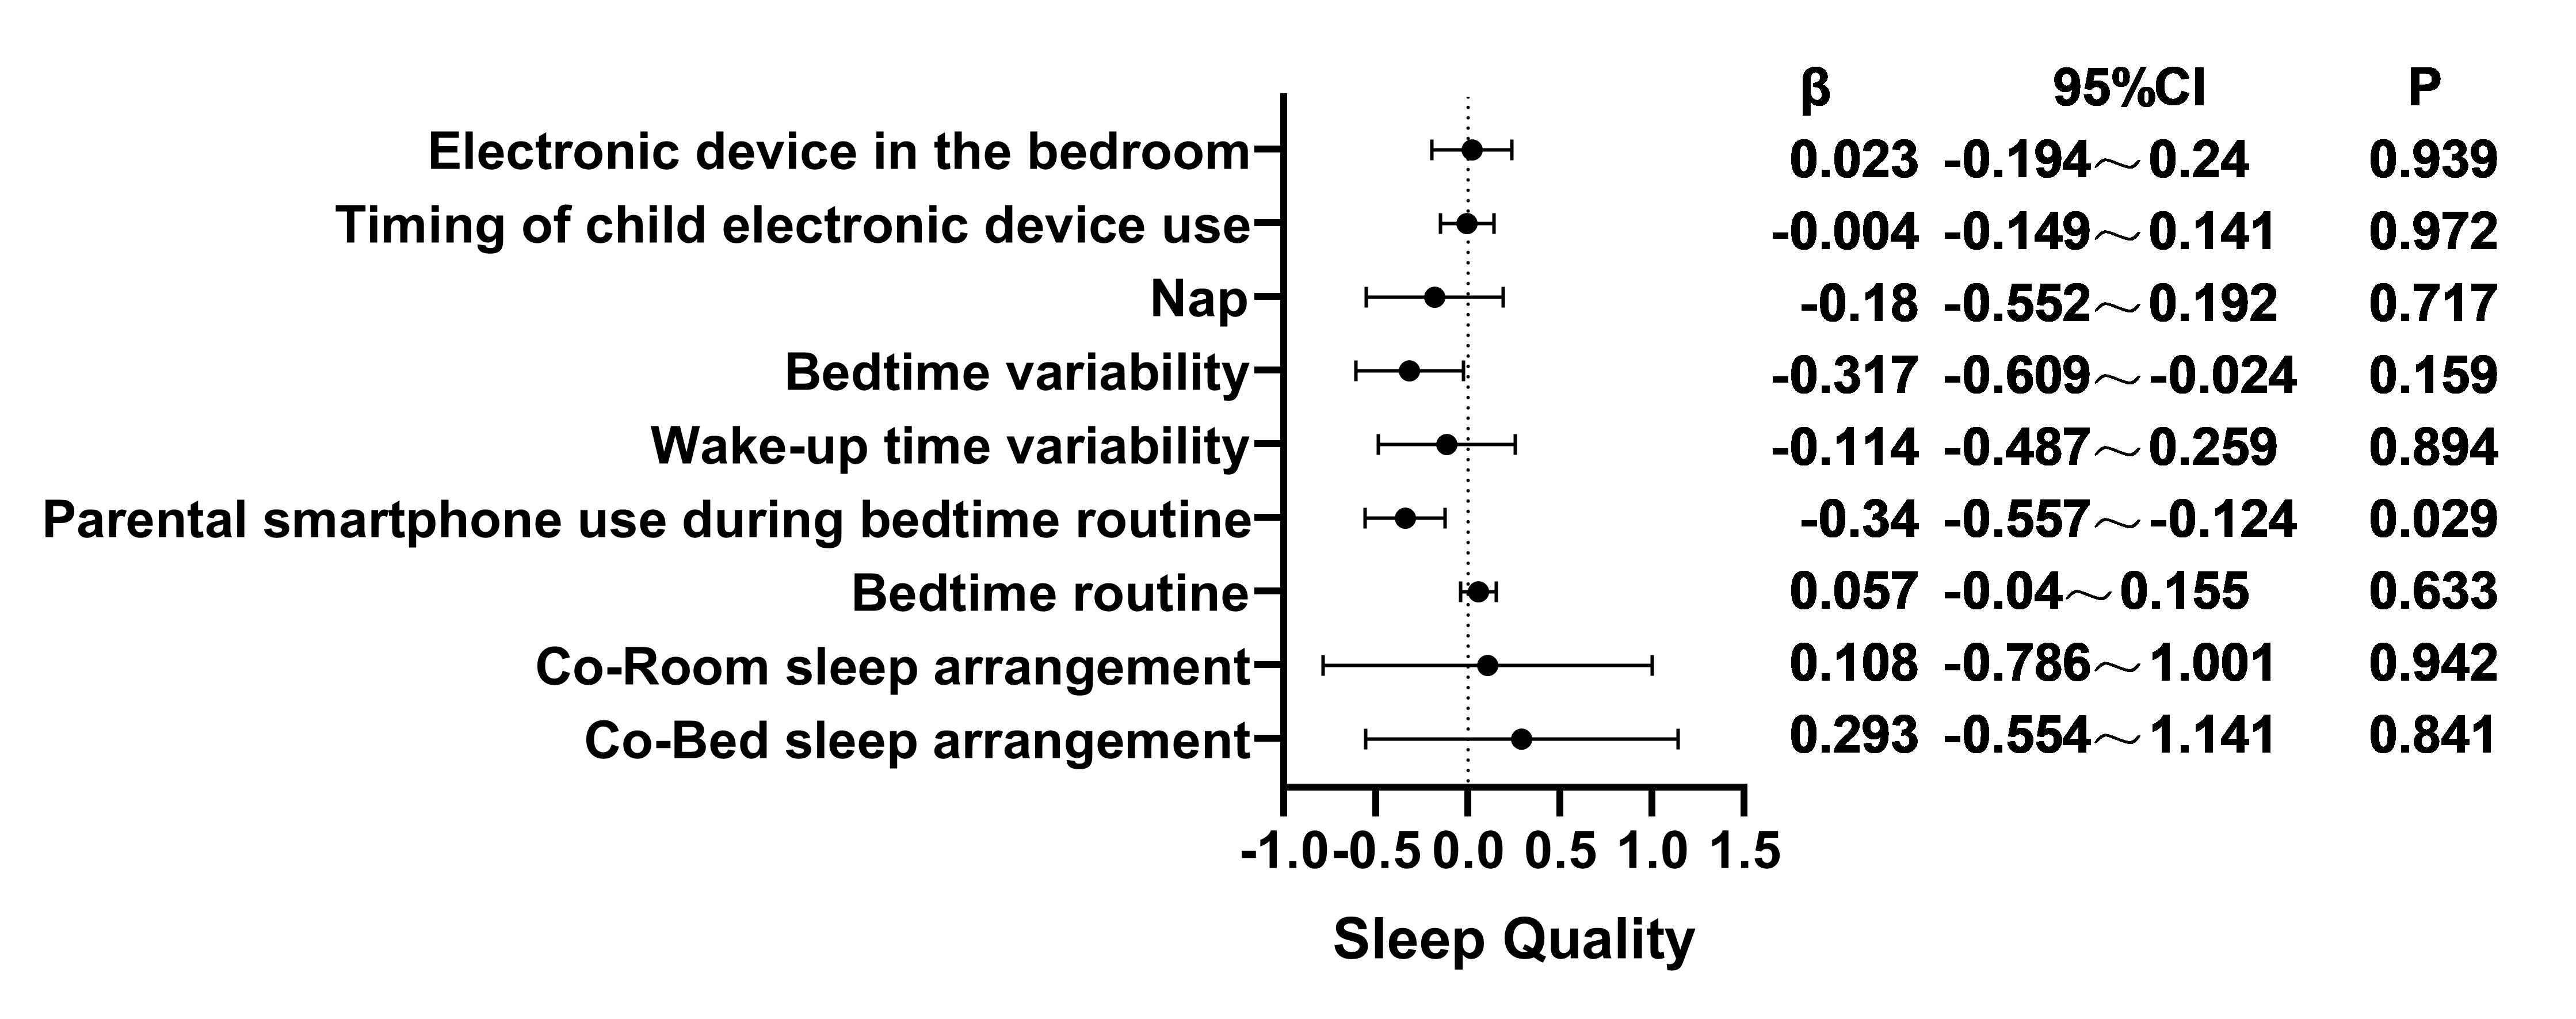


**Figure S5:** Relationship of **Parenting Practices with Sleep Quality. Abbreviation: CSHQ, Children's Sleep Habits Questionnaire; CI, confidence interval**

**
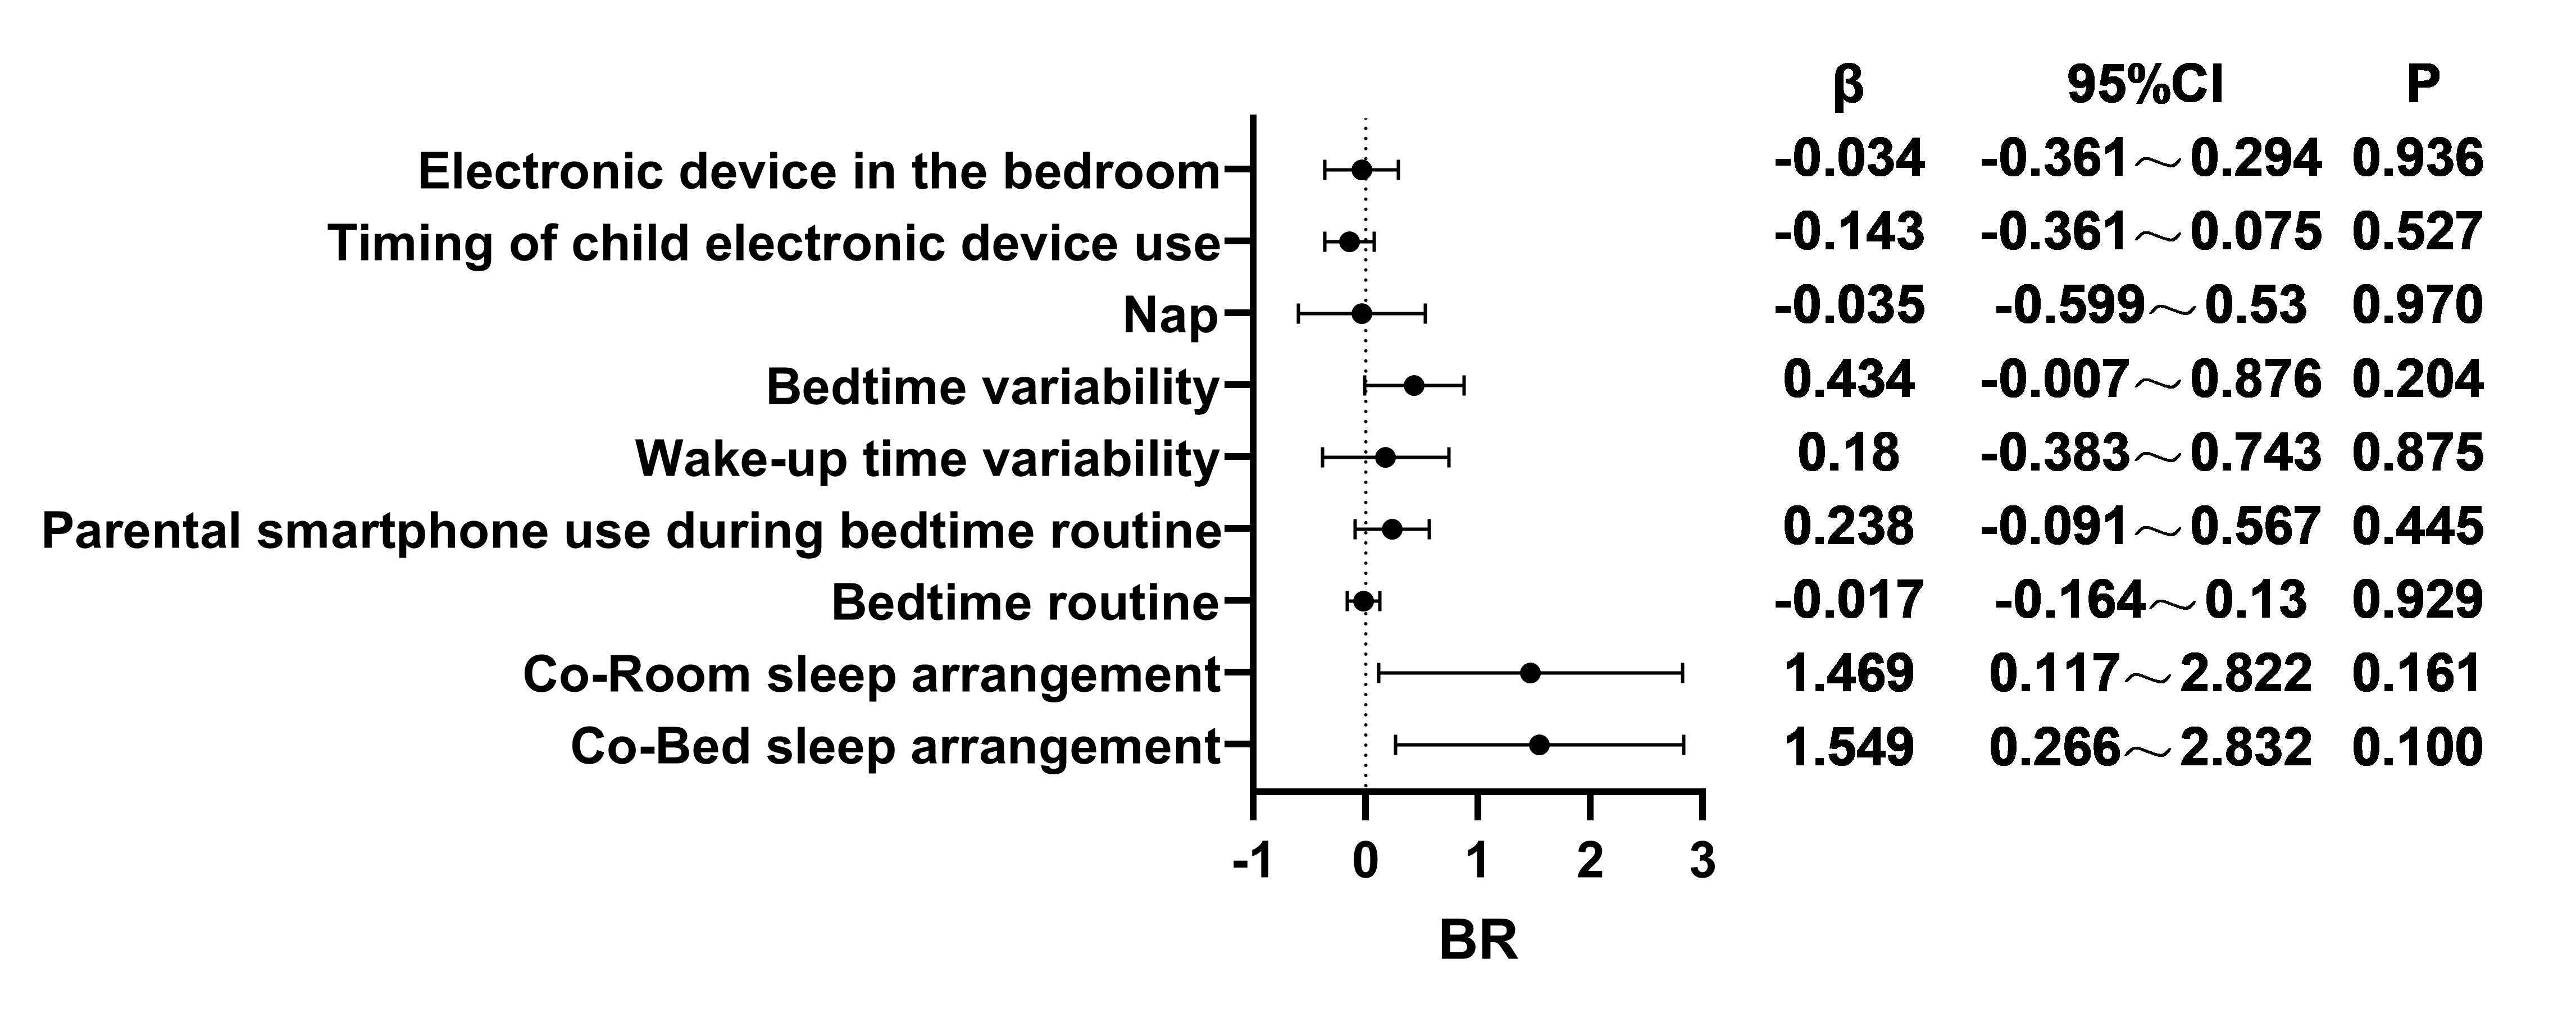
**

**Figure S6:** Relationship of **Parenting Practices with Bedtime Resistance. Abbreviation: CSHQ, Children's Sleep Habits Questionnaire; CI, confidence interval; BR, bedtime resistance**

**
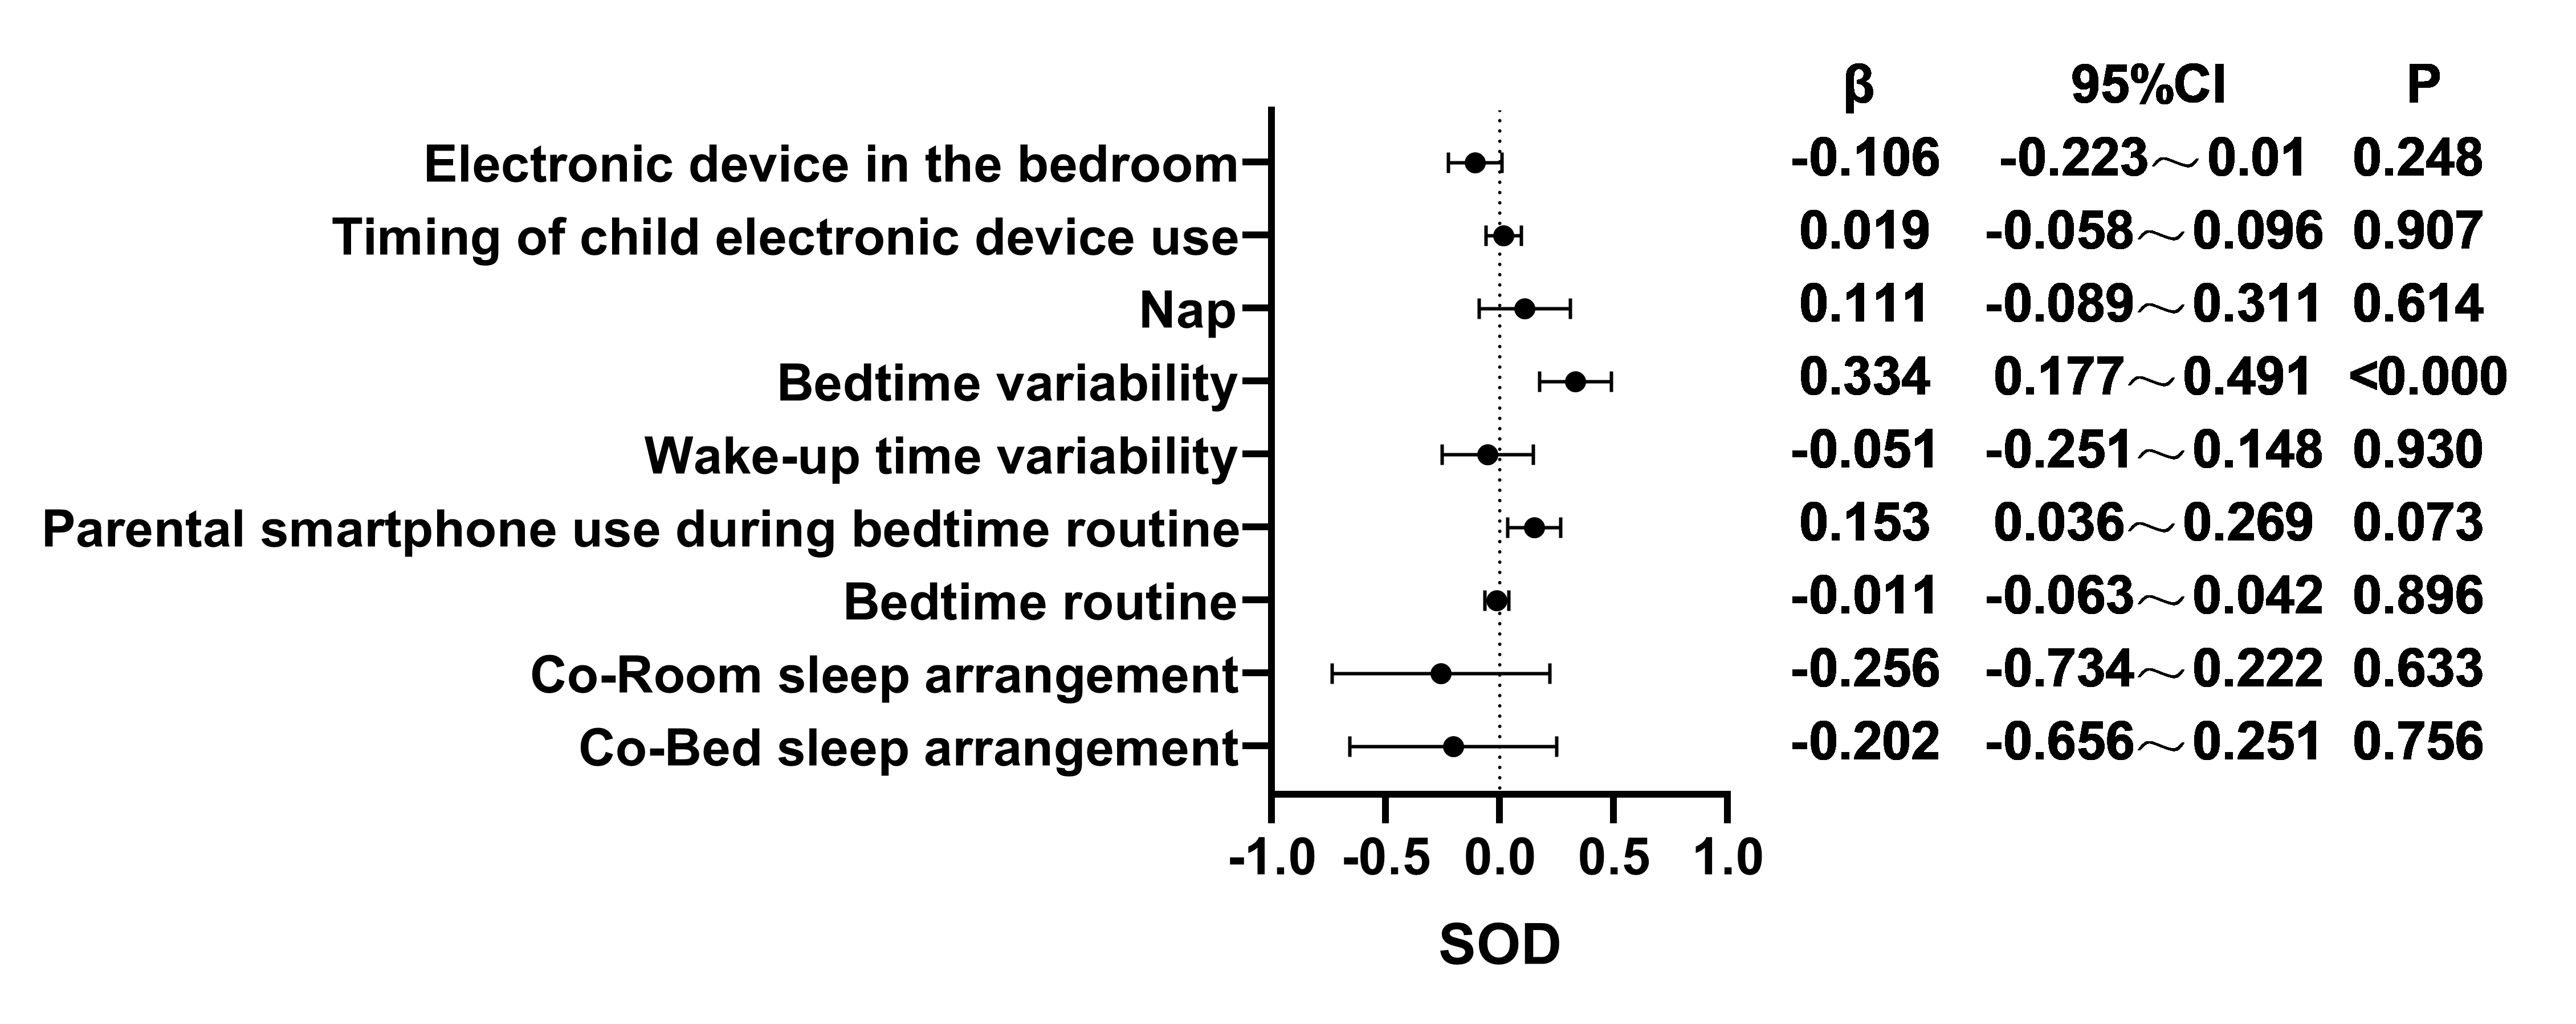
**

**Figure S7:** Relationship of **Parenting Practices with Sleep Onset Delay. Abbreviation: CSHQ, Children's Sleep Habits Questionnaire; CI, confidence interval; SOD, sleep onset delay**


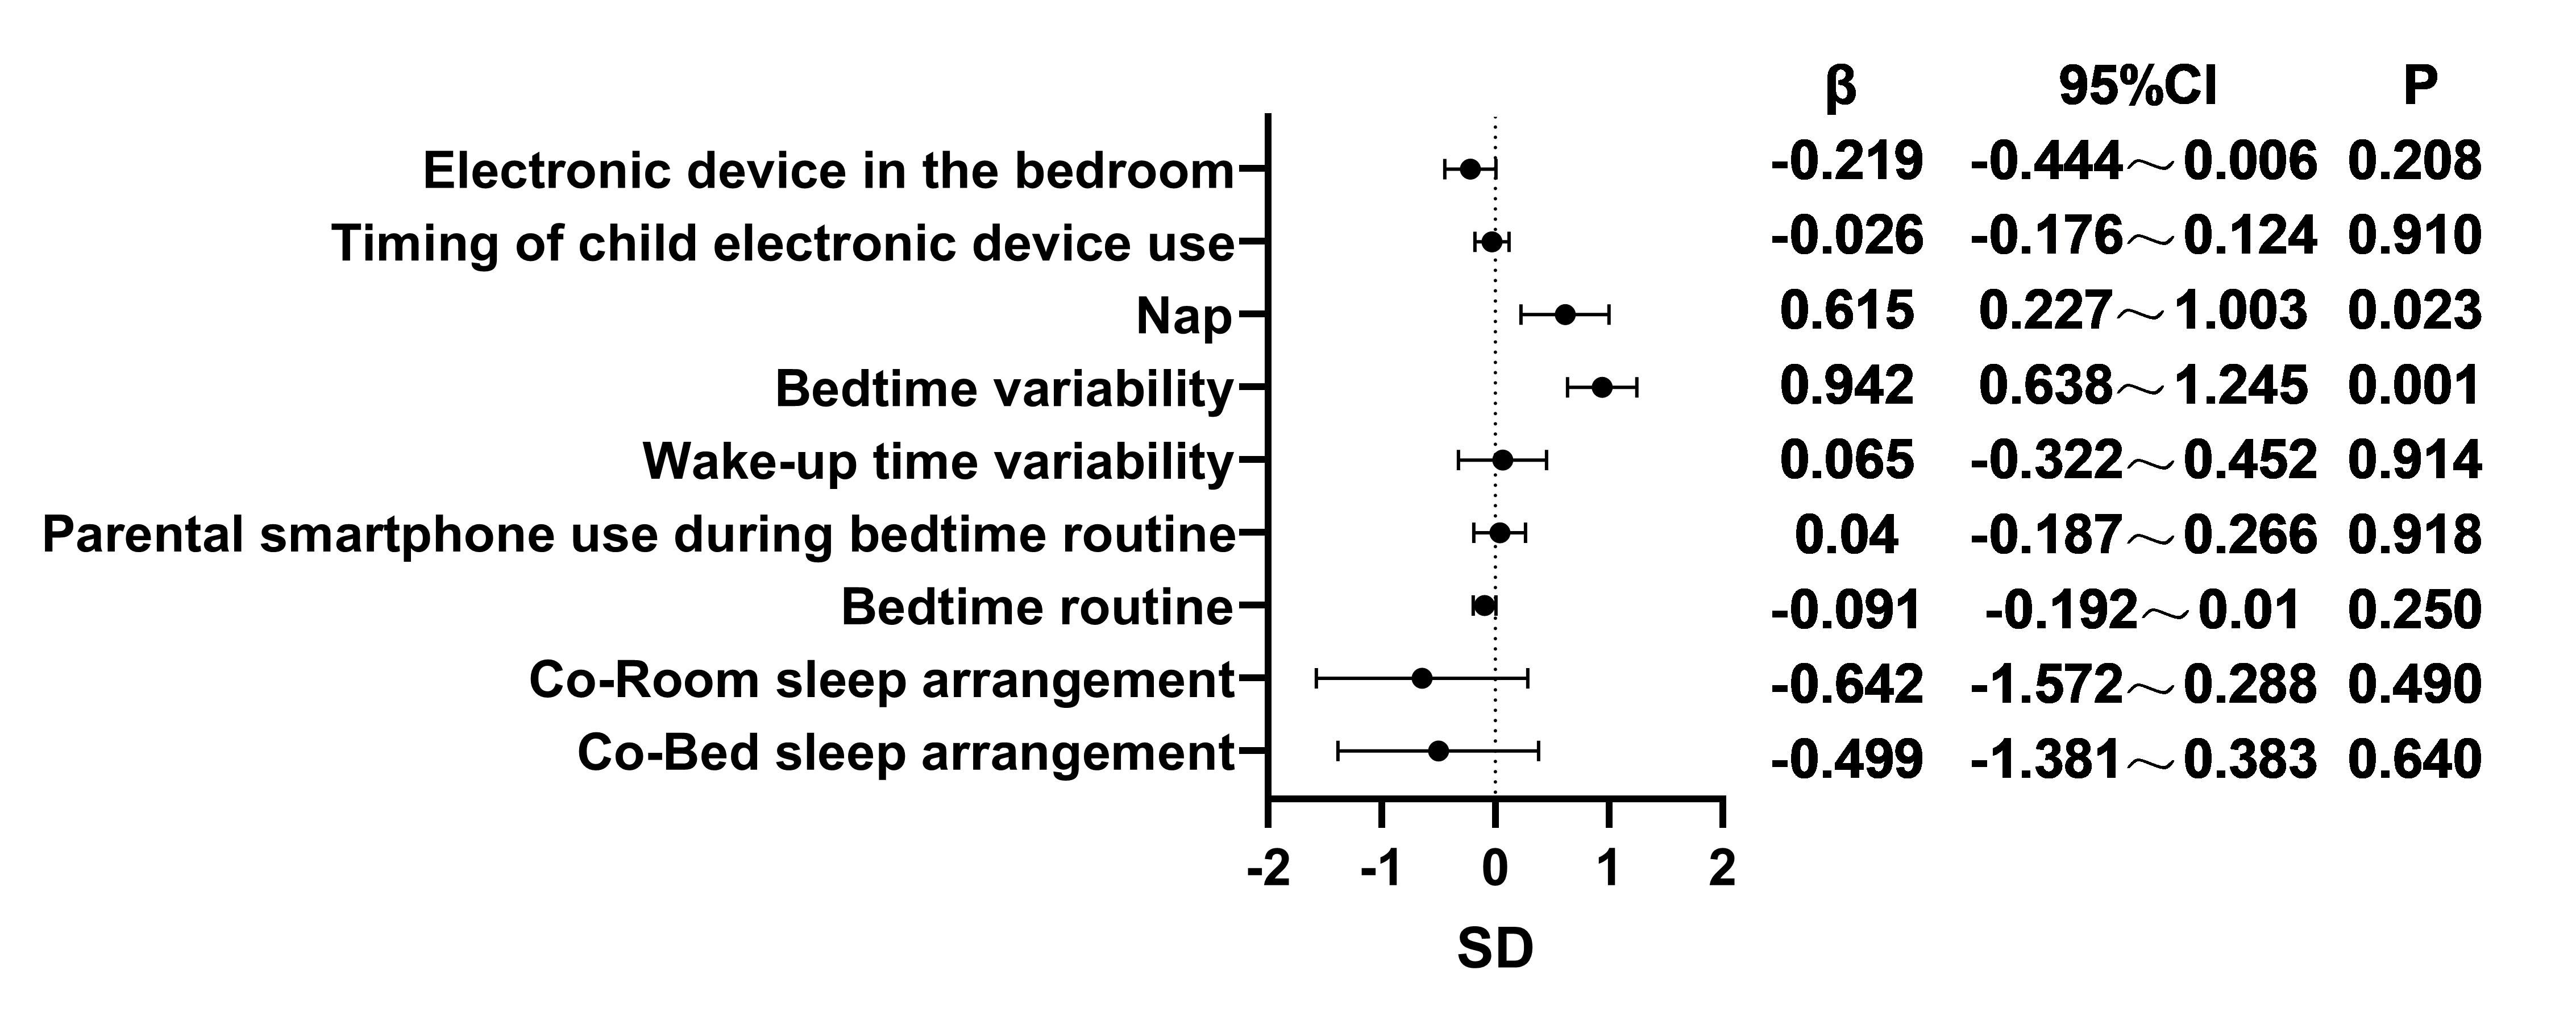


**Figure S8:** Relationship of **Parenting Practices with Sleep Duration. Abbreviation: CSHQ, Children's Sleep Habits Questionnaire; CI, confidence interval; SD, sleep duration**


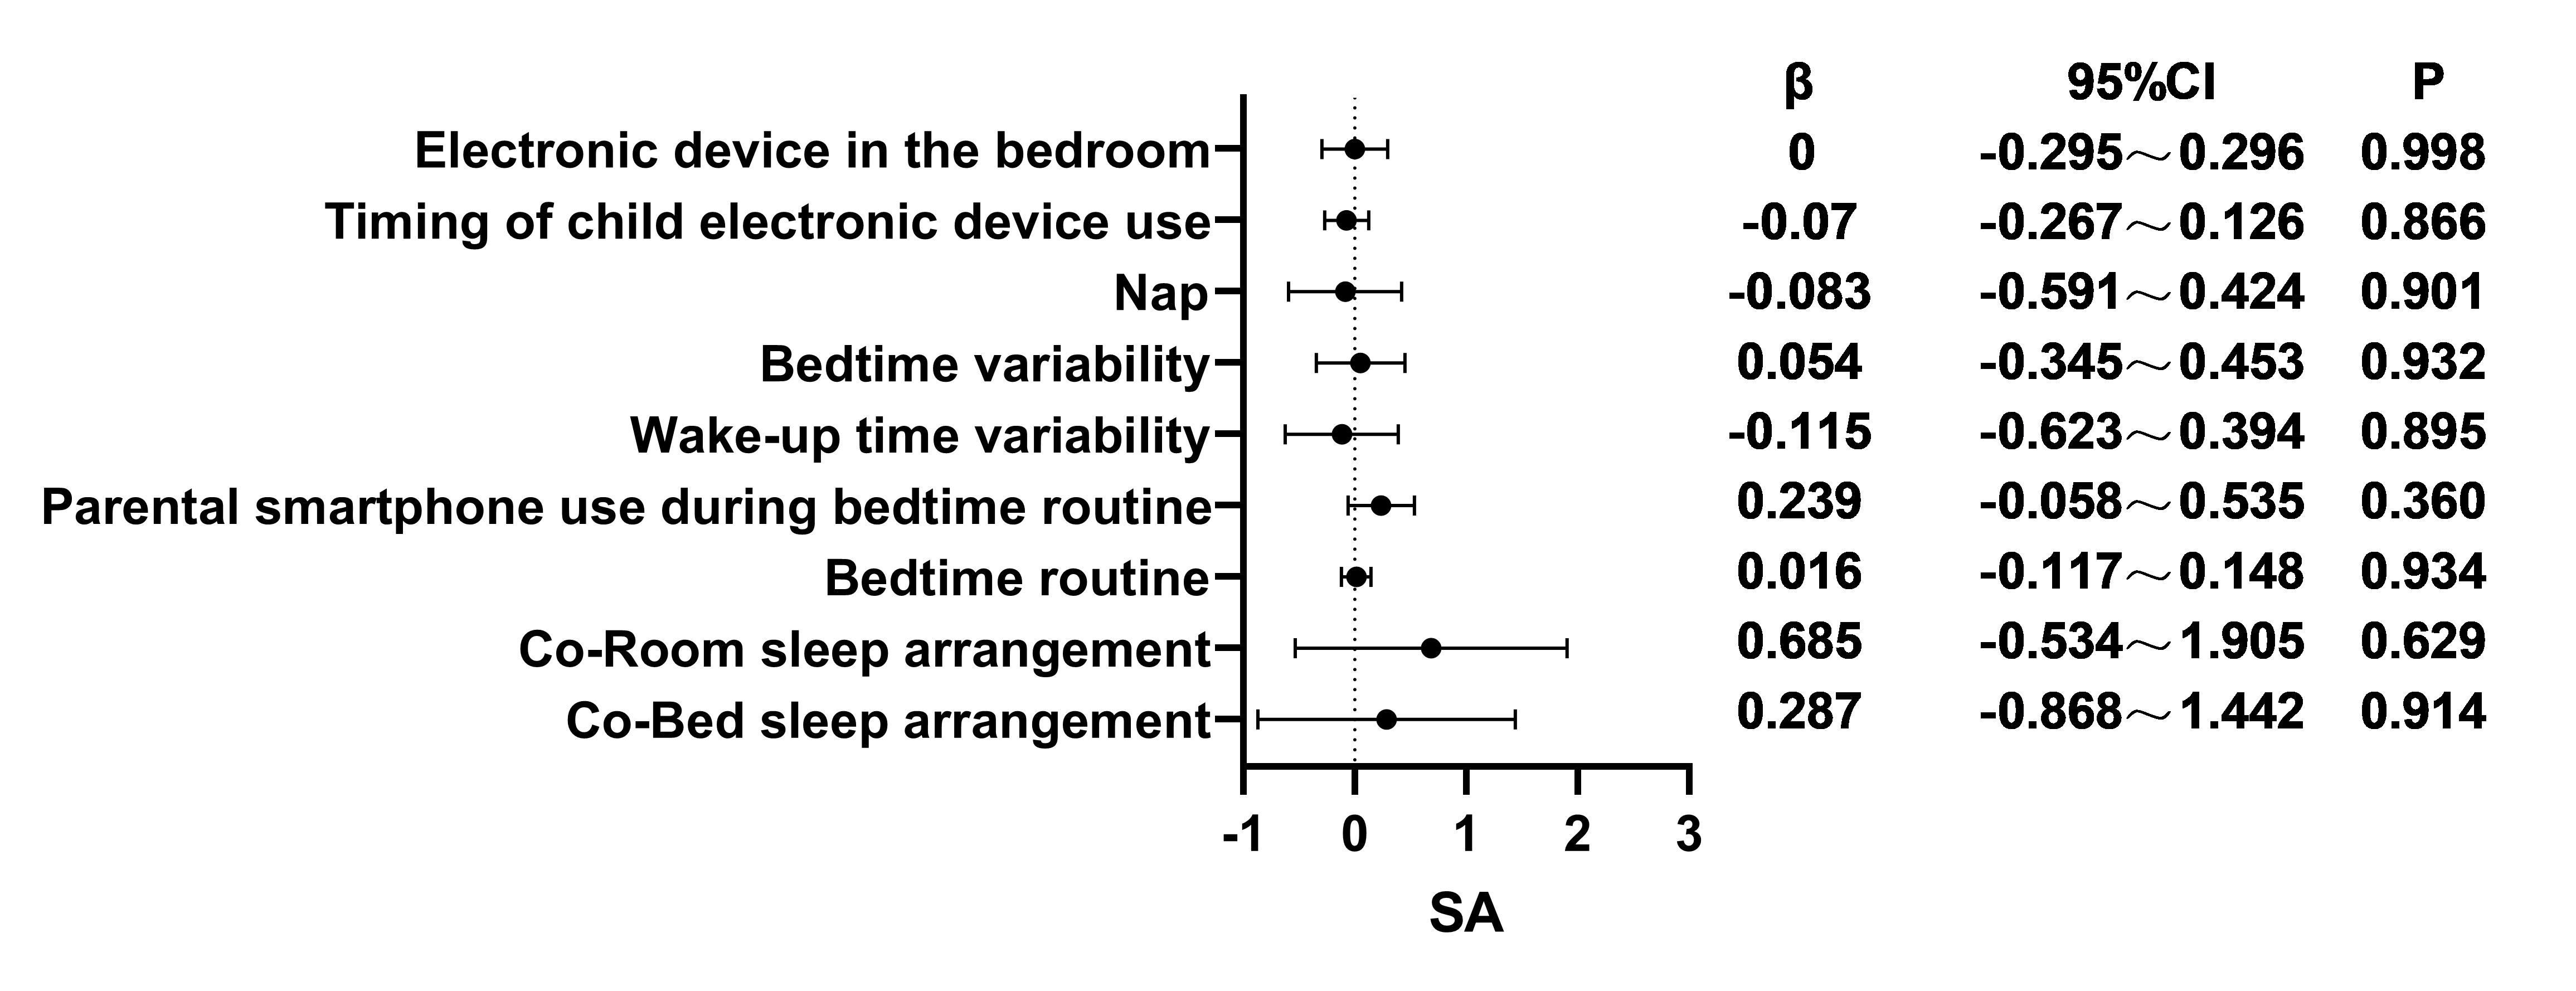


**Figure S9:** Relationship of **Parenting Practices with Sleep Anxiety. Abbreviation: CSHQ, Children's Sleep Habits Questionnaire; CI, confidence interval; SA, sleep anxiety**


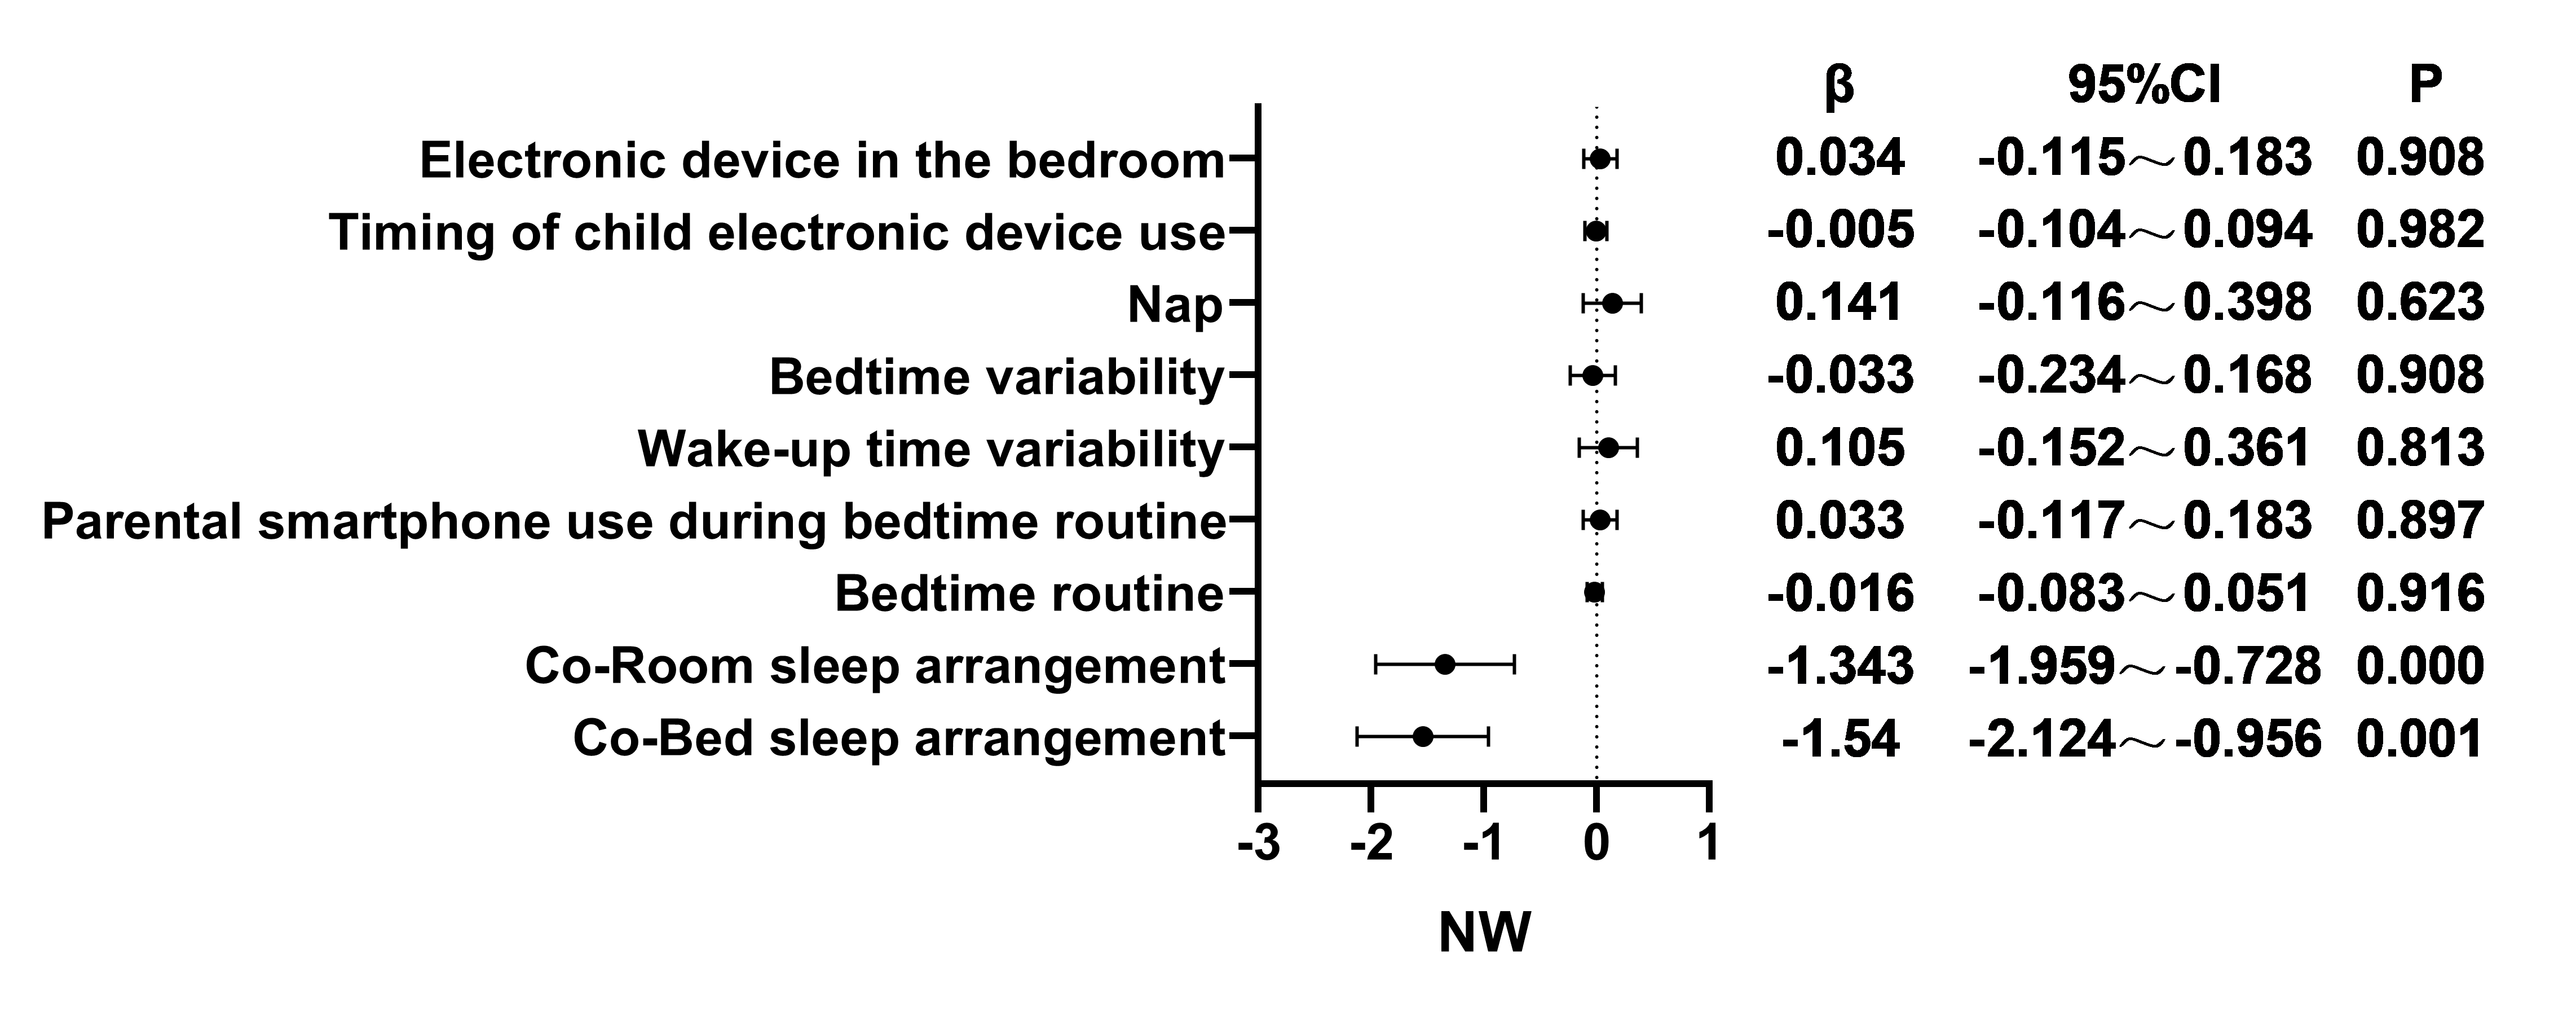


**Figure S10:** Relationship of **Parenting Practices with Night Wakings. Abbreviation: CSHQ, Children's Sleep Habits Questionnaire; CI, confidence interval; NW, night wakings**


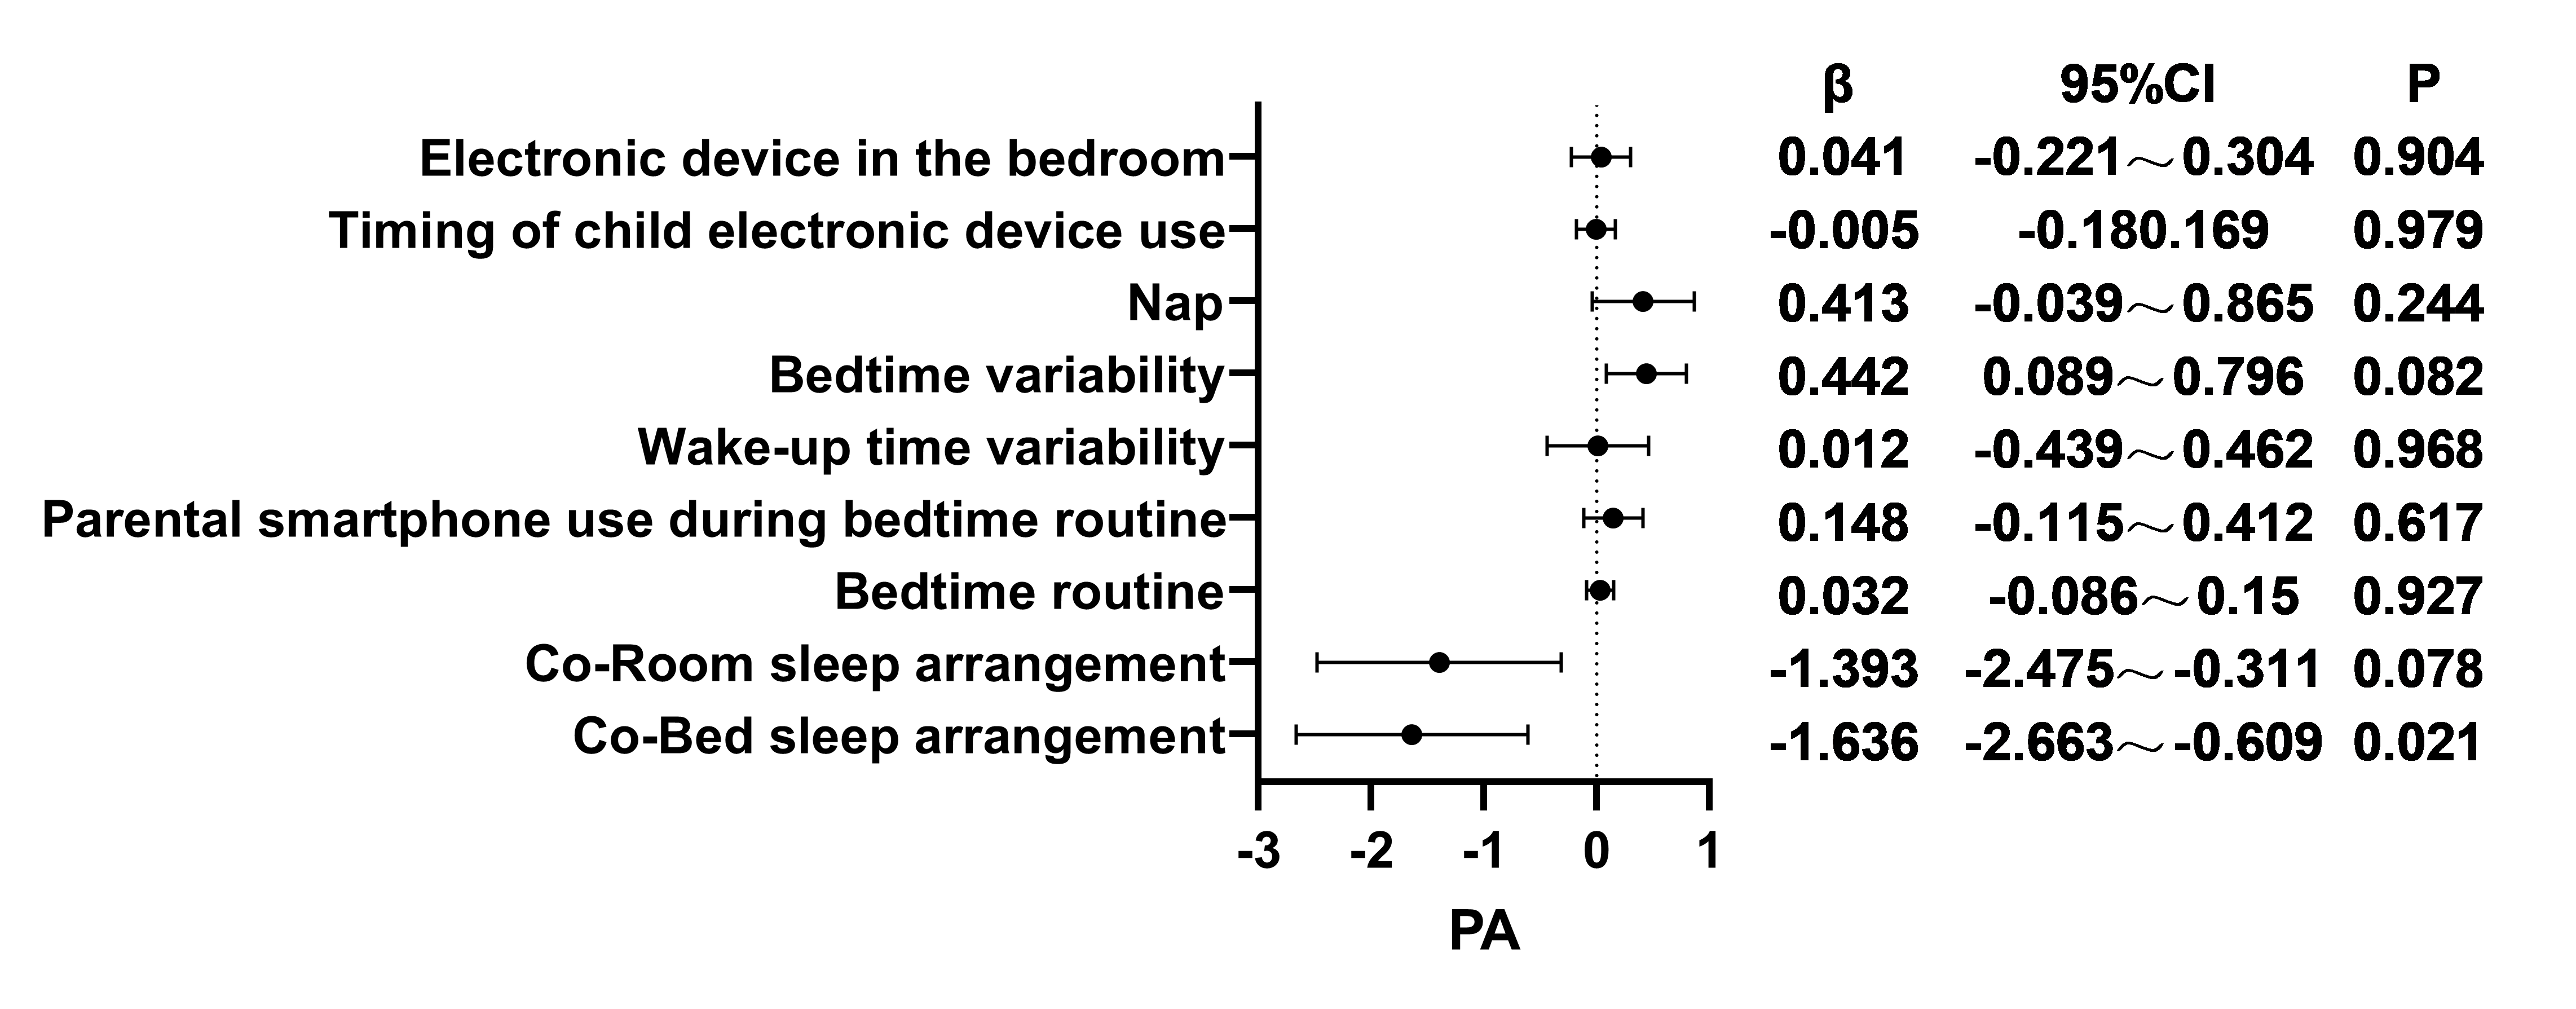


**Figure S11:** Relationship of **Parenting Practices with Parasomnias. Abbreviation: CSHQ, Children's Sleep Habits Questionnaire; CI, confidence interval; PA, parasomnias**


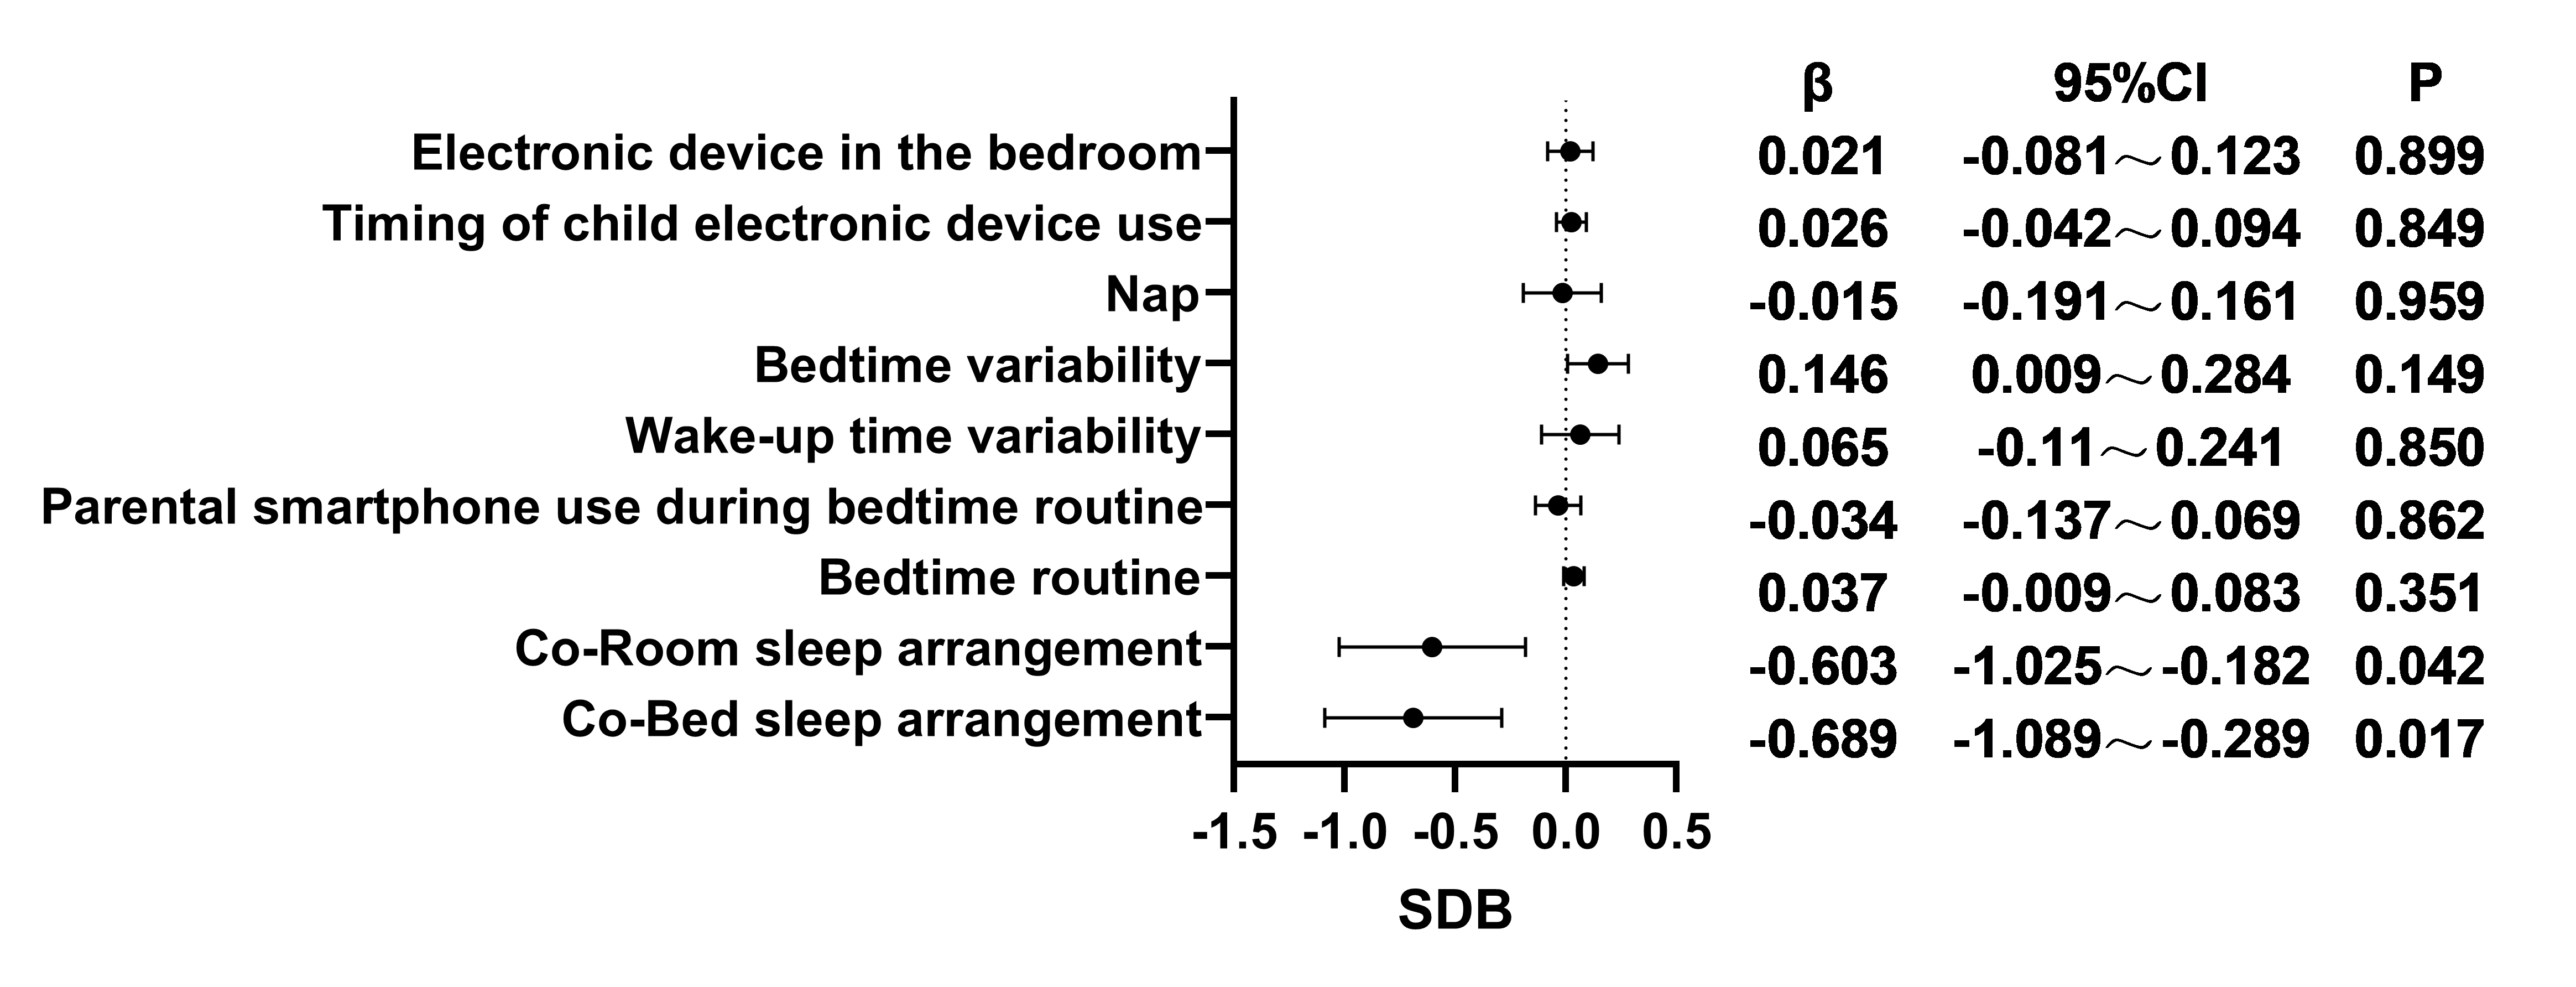


**Figure S12:** Relationship of **Parenting Practices with Sleep Disordered Breathing. Abbreviation: CSHQ, Children's Sleep Habits Questionnaire; CI, confidence interval; SDB, sleep disordered breathing**


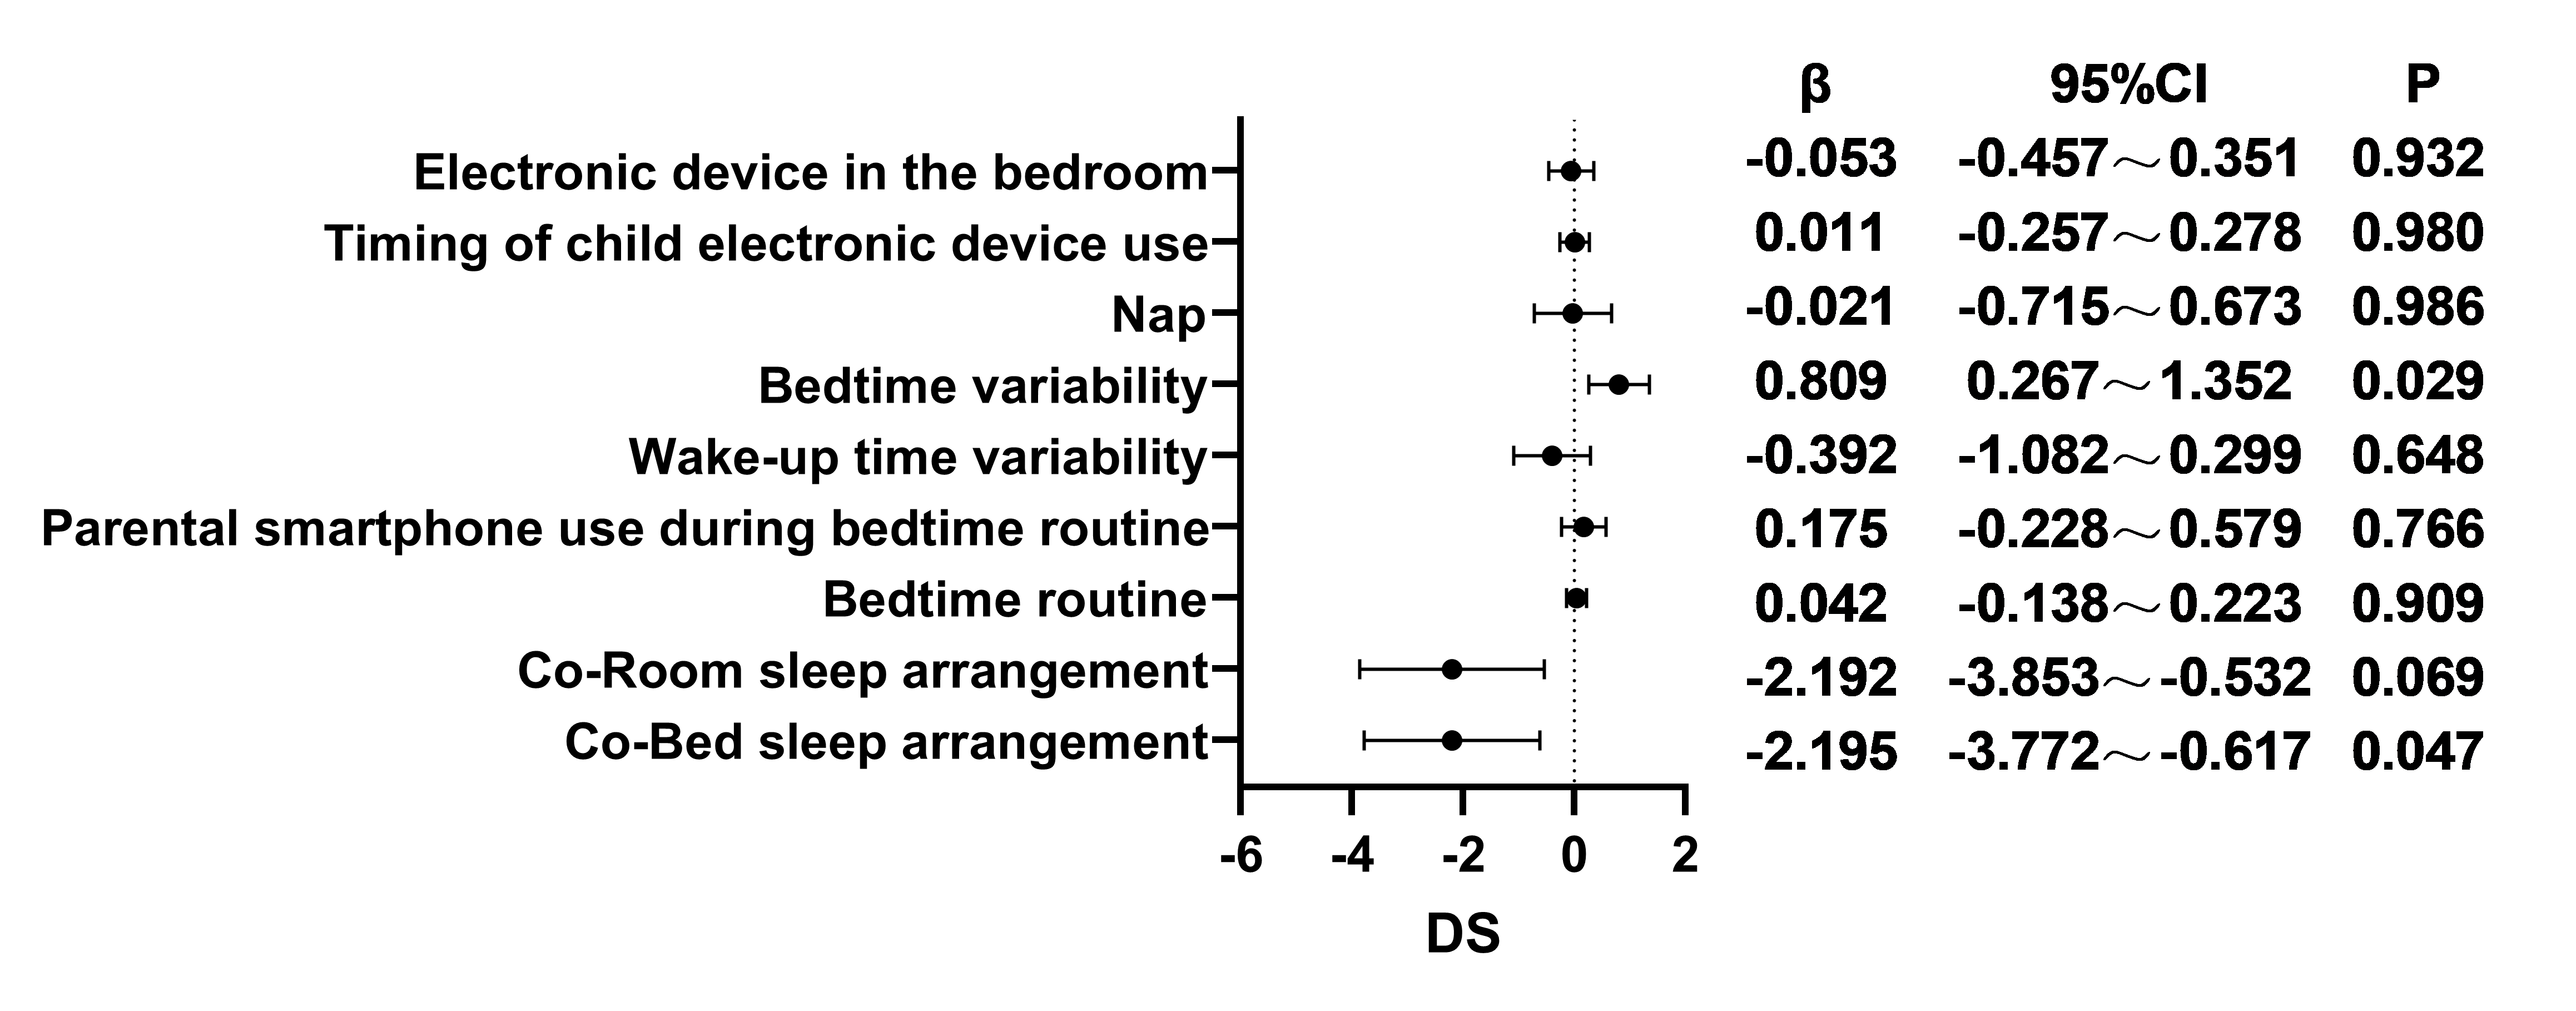


**Figure S13:** Relationship of **Parenting Practices with Daytime Sleepiness. Abbreviation: CSHQ, Children's Sleep Habits Questionnaire; CI, confidence interval; DS, daytime sleepiness**
